# Supplementary material for: Proteome remodelling by the stress sigma factor RpoS/σS in Salmonella: identification of small proteins and evidence for post-transcriptional regulation
Source: PubMed Central journal article supplement (PMC5437024; doi:10.1038/s41598-017-02362-3), 2017-05-18
Supplement: 41598_2017_2362_MOESM1_ESM.pdf [file 41598_2017_2362_MOESM1_ESM.pdf]

## SUPPLEMENTARY INFORMATION

### **Proteome remodelling by the stress sigma factor RpoS/ $\sigma^S$ in *Salmonella*: identification of small proteins and evidence for post-transcriptional regulation.**

Magali Lago<sup>1,2,3§</sup>, Véronique Monteil<sup>1,2,4§</sup>, Thibaut Douche<sup>5</sup>, Julien Guglielmini<sup>6</sup>, Alexis Criscuolo<sup>6</sup>, Corinne Maufrais<sup>6</sup>, Mariette Matondo<sup>5</sup> and Françoise Norel<sup>1,2,4\*</sup>

<sup>1</sup>: Institut Pasteur, Laboratoire Systèmes Macromoléculaires et Signalisation, Département de Microbiologie, rue du Dr. Roux, 75015 Paris, France

<sup>2</sup>: CNRS ERL6002, rue du Docteur Roux, 75015, Paris, France

<sup>3</sup>: Université Paris Diderot, Sorbonne Paris Cité, Cellule Pasteur, Paris, rue du Dr. Roux, 75015, Paris, France

<sup>4</sup>: Institut Pasteur, Unité de Biochimie des Interactions Macromoléculaires, Département de Biologie structurale et Chimie, rue du Dr. Roux, 75015 Paris, France

<sup>5</sup>: Institut Pasteur, Unité de Spectrométrie de Masse Structurale et Protéomique, Département de Biologie Structurale et Chimie, UMR3528, rue du Dr. Roux, 75015 Paris, France

<sup>6</sup>: Institut Pasteur, Bioinformatics and Biostatistics Hub, C3BI, USR 3756 IP CNRS, rue du Dr. Roux, 75015 Paris, France

§ These two authors contributed equally to this work

\* Corresponding author; Email: francoise.norel@pasteur.fr Tel: (33) 140613122

## Supplementary Methods

**DNA manipulations, epitope tagging, *lacZ* fusions and inactivation of chromosomal genes.** Standard molecular biology techniques were used<sup>4,54</sup>. Oligonucleotides were obtained from Sigma-Aldrich and are listed in Supplementary Table S3. DNA sequencing was performed by the Cochin sequencing platform (Paris, FRANCE). Chromosomal deletions, 3x-Flag epitope tagging, and *lacZ* fusions were generated in *Salmonella* ATCC14028 using PCR-generated linear DNA fragments (Supplementary Table S3) and  $\lambda$ -Red recombination-based method<sup>16,17,67-70</sup>. All strains were confirmed to contain the expected mutation by DNA sequencing.

**Electrophoresis and immunoblot analysis of proteins.** Whole-cell extracts were prepared and SDS-polyacrylamide gel electrophoresis was carried out as described<sup>71,72</sup>. For detection of 3x-Flag-tagged proteins during growth, exponential-phase cultures of *Salmonella* in LB at 37°C were diluted into LB prewarmed at 37°C to prolong the exponential phase, and aliquots were removed during the exponential phase and stationary phase. The amount of proteins in whole-cell lysates was determined using the DC Protein Assay kit (Bio-Rad). Equal amounts of proteins were loaded in each slot. The molecular sizes of the proteins were estimated using Precision Plus Protein Standard (Bio-Rad). Proteins were transferred to nitrocellulose blotting membranes (Amersham Protan, GE Healthcare). Reversible Ponceau staining<sup>54</sup> of the membrane was used to check proteins transfer. Membranes were incubated with a mouse anti-Flag antibody (F3165 Sigma) as previously described<sup>71,72</sup>. Bound antibodies were detected using a secondary anti-mouse antibody linked to peroxidase (A4416 Sigma) and the Pierce ECL Plus western blotting substrate (Thermoscientific).

**Enzymatic assays.**  $\beta$ -galactosidase activity was measured as described by Miller<sup>55</sup> and is expressed in Miller units.

**Sequence analyses.** Trans-membrane fragments (TM) were predicted with TMHMM (<http://www.cbs.dtu.dk/services/TMHMM/>). Signal peptides (SP) were predicted with SignalPep (<http://www.cbs.dtu.dk/services/SignalP/>). Lipoproteins (Lipo) were predicted with the LipoP 1.0 Server (<http://www.cbs.dtu.dk/services/LipoP/>). InterPro (<https://www.ebi.ac.uk/interpro/>) was used to classify proteins into families and to predict domains.

**Collection of putative homologs of small  $\sigma^S$ -dependent genes.** Each amino acid query sequence was used to perform a PSI-BLAST similarity search<sup>73</sup> against the NCBI protein databank (nrprot). As homology is quite difficult to assess when considering small query sequences (e.g. < 80 amino acid character states), PSI-BLAST searches were performed with relaxed parameters, i.e. word size = 2, E-value threshold =  $10^5$ , and both substitution matrix and gap cost value adjusted according to the query lengths (for more details, see [www.ncbi.nlm.nih.gov/blast/html/sub\\_matrix.html](http://www.ncbi.nlm.nih.gov/blast/html/sub_matrix.html)). This initial procedure has led to very large initial sets of candidate sequences that were next mined in order to gather those that allow observing significant similarity with the corresponding query sequence. For each set, given its position-specific score matrix (pssm) estimated during the PSI-BLAST search (for more details, see<sup>73</sup>), the Bit-score value was estimated against each candidate sequence and a p-value was derived by comparing this Bit-score value to those estimated against 1,000 random shuffling of the same sequence. Shuffling was performed by locally exchanging residues within a window of 20 (e.g.<sup>74,75</sup>). From each set, significantly similar candidates (p-value < 0.01) were therefore selected and aligned with MAFFT (version 7.273) with the L-

INS-i method<sup>76</sup>. These multiple sequence alignments were used to infer Hidden Markov Model (HMM) protein profiles, and final sets of putative homologs were built by performing HMM profile searches against the initial sets of candidate sequences with HMMer version 3.1b2<sup>77</sup> (E-value threshold =  $10^{-4}$ ). We also built a more restricted set of sequences by using an HMM E-value threshold of  $10^{-5}$  and by filtering out outliers. We consider as outliers sequences that are too short or too long, as assessed by the modified Z-score<sup>78</sup>.



## Supplementary Figures

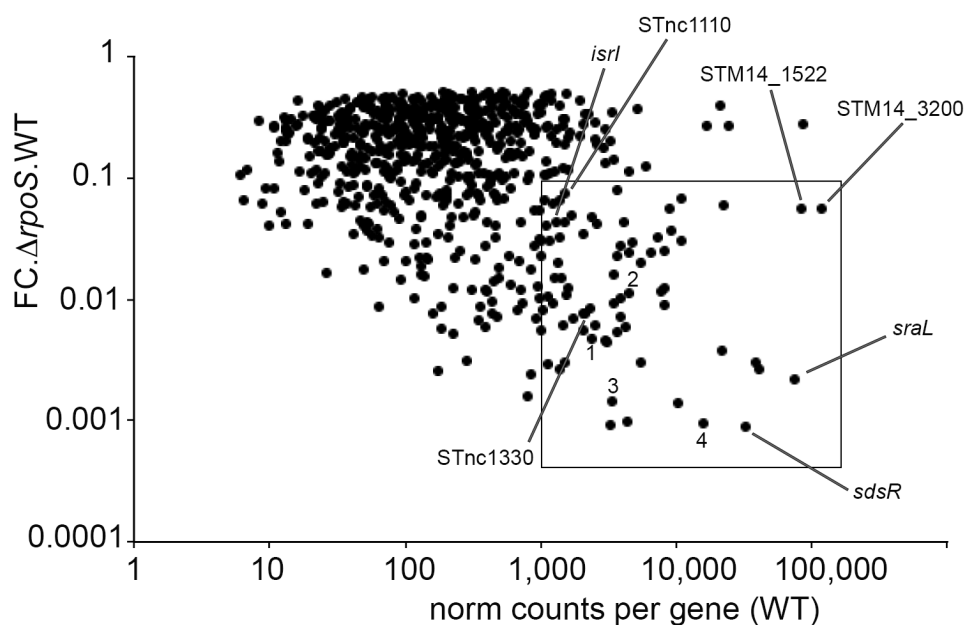

**Figure S1. Relative expression level and  $\sigma^S$ -activation of genes identified by RNA sequencing in<sup>16</sup>.** RNA reads, identified by RNA sequencing in the wild type and  $\Delta rpoS$  strains of ATCC14028, were mapped to genes annotated in the genome of this strain<sup>16</sup>. Dots represent genes positively controlled by  $\sigma^S$  ( $p < 0.05$ )<sup>16</sup>. The x-axis shows normalized RNA reads counts in the wild-type strain (WT), normalized to the length of the gene, thus indicating the relative expression level of the gene in the wild type strain<sup>16</sup>. The y-axis shows the fold change in the expression levels of the gene in the  $\Delta rpoS$  mutant compared to the wild-type strain ( $p < 0.05$ ). Genes showing the highest read counts per gene (above 1000) and fold induction by  $\sigma^S$  (more than 10) are highlighted by a box. Putative arginine tRNA genes (*STM14\_1522* and *STM14\_3200*) and the annotated sRNAs genes *sdsR*, *sraL*, *isrI*, *STnc1110* and *STnc1330* are labelled. RNA reads labelled dots 1-4 were assigned to the putative small ORFs *STM14\_0419*, *STM14\_1274*, *STM14\_1559* and *STM14\_5096* (Supplementary Fig. S4). However, analyses of the RNA reads coverage and sequence features in the corresponding genomic regions suggested that these transcripts more likely correspond to long 5' UnTranslated Regions (UTR) of  $\sigma^S$ -dependent genes (see Supplementary Fig. S4 for details). The other  $\sigma^S$ -dependent genes in the box are listed in Supplementary Table S1. Among these, nineteen putative small ORFs of unknown function have been studied in the present work (Table 1 and Supplementary Figs. S5 and S6).

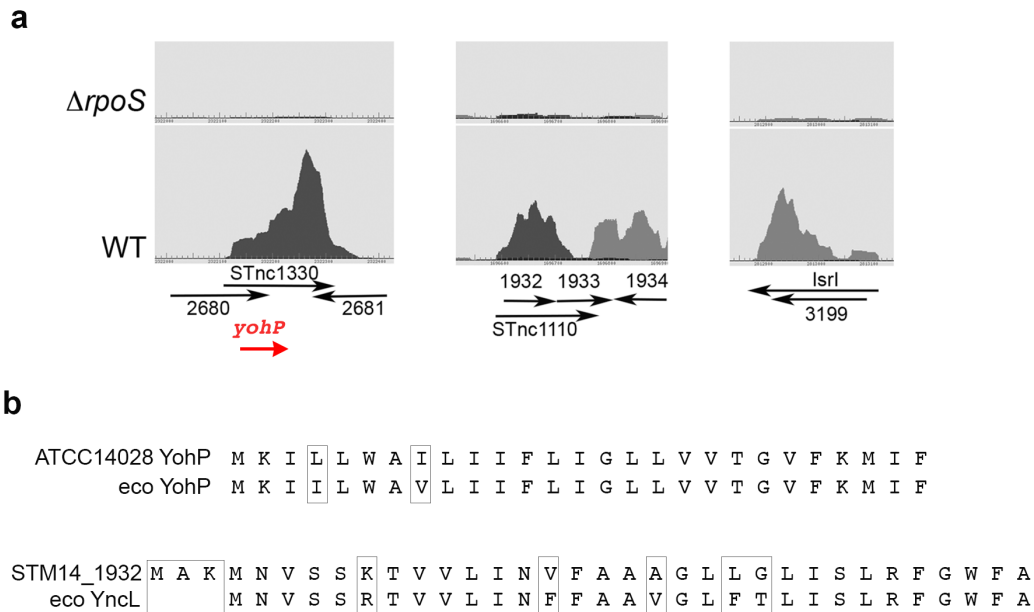

**Figure S2. Sequence features of the  $\sigma^S$ -dependent sRNAs STnc1330, STnc1110 and IsrI.** (a) RNA reads, identified by RNA sequencing in the wild type (WT) and  $\Delta rpoS$  strains of ATCC14028, mapped to the genomic regions of STnc1330, STnc1110 and IsrI<sup>16</sup>. Mapped RNA reads were formatted into graph files for visualization at a strand-specific manner (black for + strand and grey for -strand) using COV2HTML<sup>79</sup>. The scale for RNA read counts on the y-axis is identical for the WT and  $\Delta rpoS$  strains, but may be different from one panel to another. Annotated ORFs (indicated by the gene number in ATCC14028) and sRNAs genes are represented by arrows. STM14\_2680, STM14\_1932, STM14\_1933 and STM14\_3199, are small putative ORFs of unknown function. In this study, an additional ORF (*yohP*) was predicted in the sequence of STnc1330 and is indicated in red. (b) Predicted amino acid sequences of ORFs found in STnc1330 (*yohP*) and STnc1110 (STM14\_1932) are aligned with the sequences of the YohP and YncL proteins of *E. coli* K12 (eco). The alignment of the predicted amino acid sequences of STM14\_1932 and *E. coli* YncL, and the non-canonical start codon and lack of ribosome binding site for STM14\_1932 (Fig. 1a), prompted us to re-annotated the start codon of this *Salmonella* ORF (Fig. 1a).

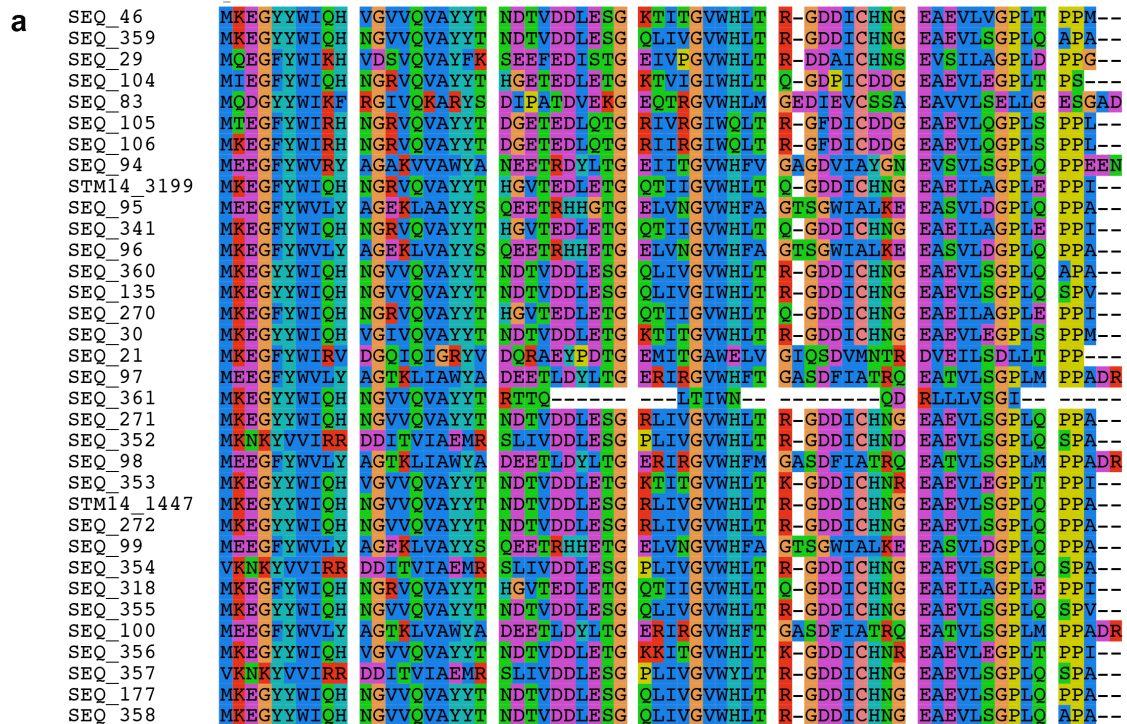

**b**

| Id         | db_prot | acc_prot     | organism                                                                                         |
|------------|---------|--------------|--------------------------------------------------------------------------------------------------|
| SEQ_21     | gb      | KFC76663     | <i>Buttiauxella agrestis</i> ATCC 33320                                                          |
| SEQ_29     | ref     | WP_042291610 | <i>Citrobacter sedlakii</i>                                                                      |
| SEQ_30     | gb      | KHE07220     | <i>Citrobacter braakii</i>                                                                       |
| SEQ_46     | gb      | AHY13764     | <i>Citrobacter freundii</i> CFNIH1                                                               |
| SEQ_83     | gb      | EFC57535     | <i>Enterobacter cancerogenus</i> ATCC 35316                                                      |
| SEQ_94     | ref     | WP_024551782 | <i>Cronobacter helveticus</i>                                                                    |
| SEQ_95     | ref     | WP_024551882 | <i>Cronobacter helveticus</i>                                                                    |
| SEQ_96     | ref     | WP_024556637 | <i>Cronobacter pulveris</i>                                                                      |
| SEQ_97     | ref     | WP_024558014 | <i>Cronobacter pulveris</i>                                                                      |
| SEQ_98     | ref     | WP_024559586 | <i>Cronobacter pulveris</i>                                                                      |
| SEQ_99     | ref     | WP_024560184 | <i>Cronobacter pulveris</i>                                                                      |
| SEQ_100    | ref     | WP_029592563 | <i>Cronobacter pulveris</i>                                                                      |
| SEQ_104    | gb      | KFC90312     | <i>Leclercia adecarboxylata</i> ATCC 23216 = NBRC 102595                                         |
| SEQ_105    | gb      | KFC98568     | <i>Leclercia adecarboxylata</i> ATCC 23216 = NBRC 102595                                         |
| SEQ_106    | gb      | KFC98616     | <i>Leclercia adecarboxylata</i> ATCC 23216 = NBRC 102595                                         |
| SEQ_135    | gb      | AGR59214     | <i>Salmonella bongori</i> N268-08                                                                |
| SEQ_177    | gb      | ACF70051     | <i>Salmonella enterica</i> subsp. <i>enterica</i> serovar Heidelberg str. SL476                  |
| SEQ_270    | gb      | EDX48454     | <i>Salmonella enterica</i> subsp. <i>enterica</i> serovar Newport str. SL317                     |
| SEQ_271    | gb      | EDX48376     | <i>Salmonella enterica</i> subsp. <i>enterica</i> serovar Newport str. SL317                     |
| SEQ_272    | gb      | EDX48942     | <i>Salmonella enterica</i> subsp. <i>enterica</i> serovar Newport str. SL317                     |
| SEQ_318    | ref     | YP_006892401 | <i>Salmonella enterica</i> subsp. <i>enterica</i> serovar Typhimurium str. LT2                   |
| SEQ_341    | gb      | ELX61473     | <i>Salmonella enterica</i> subsp. <i>enterica</i> serovar Typhimurium str. LT2-4_delta.ramA::kan |
| STM14_3199 | gb      | ACY89629     | <i>Salmonella enterica</i> subsp. <i>enterica</i> serovar Typhimurium str. 14028S                |
| STM14_1447 | gb      | ACY87933     | <i>Salmonella enterica</i> subsp. <i>enterica</i> serovar Typhimurium str. 14028S                |
| SEQ_352    | gb      | EHY70819     | <i>Salmonella enterica</i> subsp. <i>houtenae</i> str. ATCC BAA-1581                             |
| SEQ_353    | gb      | EHY70086     | <i>Salmonella enterica</i> subsp. <i>houtenae</i> str. ATCC BAA-1581                             |
| SEQ_354    | gb      | ENZ86590     | <i>Salmonella enterica</i> subsp. <i>houtenae</i> serovar 16:z4,z32:- str. RKS3027               |
| SEQ_355    | gb      | ESE91007     | <i>Salmonella enterica</i> subsp. <i>houtenae</i> serovar 50:g,z51:- str. 01-0133                |
| SEQ_356    | gb      | ESE85565     | <i>Salmonella enterica</i> subsp. <i>houtenae</i> serovar 50:g,z51:- str. 01-0133                |
| SEQ_357    | gb      | ESE89762     | <i>Salmonella enterica</i> subsp. <i>houtenae</i> serovar 50:g,z51:- str. 01-0133                |
| SEQ_358    | gb      | ESE81092     | <i>Salmonella enterica</i> subsp. <i>indica</i> serovar 6,14,25:z10:1,(2),7 str. 1121            |
| SEQ_359    | gb      | ESE82382     | <i>Salmonella enterica</i> subsp. <i>indica</i> serovar 6,14,25:z10:1,(2),7 str. 1121            |
| SEQ_360    | gb      | ESE83293     | <i>Salmonella enterica</i> subsp. <i>indica</i> serovar 6,14,25:z10:1,(2),7 str. 1121            |
| SEQ_361    | gb      | ESE64759     | <i>Salmonella enterica</i> subsp. <i>salamae</i> serovar 58:1,z13,z28:z6 str. 00-0163            |

**Figure S3. Conservation of STM14\_3199.** (a) Sequence alignment of the STM14\_3199 product and homologous proteins. The alignment was visualized with seaview <http://pbil.univ-lyon1.fr/software/seaview>. (b) List of homologous sequences in other bacterial species. STM14\_1447 and STM14\_3199 are paralogous genes.

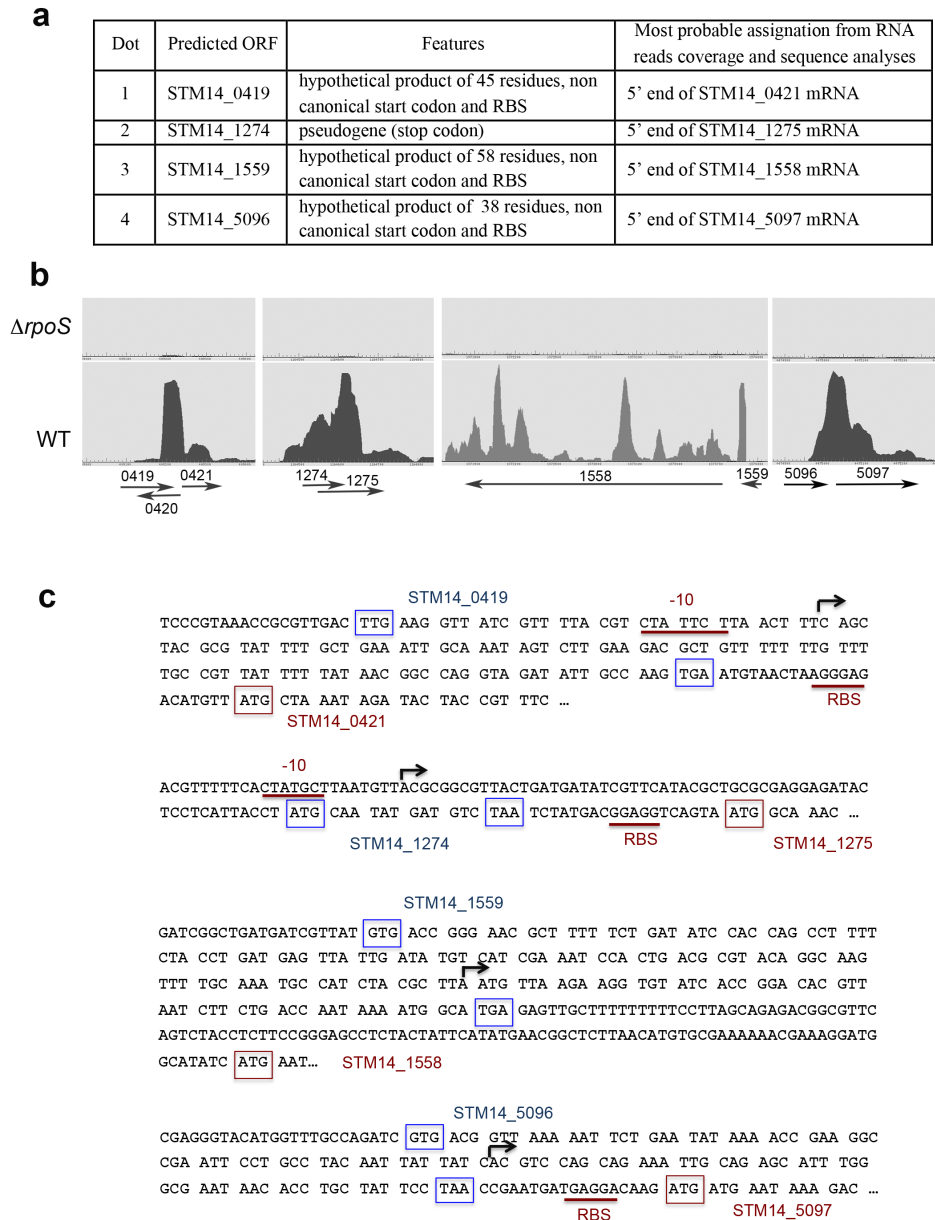

**Figure S4. Long 5' UnTranslated Regions (UTR) of  $\sigma^S$ -dependent genes and their sequence features.** (a) RNA reads labelled dots 1 to 4 on Supplementary Fig. S1 were mapped on the genome of ATCC14028 and assigned to the putative small ORFs STM14\_0419, STM14\_1559, STM14\_5096 and the pseudogene STM14\_1274<sup>16</sup>. However, analyses of the RNA reads coverage (b), location of transcription start sites and sequence features (c) in the corresponding genomic regions suggested that these transcripts more likely correspond to long 5' UnTranslated Region (UTR) of the  $\sigma^S$ -dependent genes STM14\_0421, STM14\_1558, STM14\_5097 and STM14\_1275, respectively. This hypothesis is consistent with the non-canonical start codons and lack of ribosome binding sites for the putative ORFs STM14\_0419, STM14\_1559 and STM14\_5096 (c). (b) RNA reads, identified by RNA sequencing in the wild-type (WT) and  $\Delta rpoS$  strains of ATCC14028 mapped to genes of interest<sup>16</sup> (represented by arrows and the gene number in ATCC14028). Mapped RNA reads were formatted into graph files for visualization at a strand-specific manner (black for + strand and grey for -strand) using COV2HTML<sup>79</sup>. The scale for read counts on the y-axis is identical for the WT and  $\Delta rpoS$  but may be different from one panel to another. (c) DNA sequences of the 5' and upstream regions of the  $\sigma^S$ -dependent genes STM14\_0421, STM14\_1275, STM14\_1558 and STM14\_5097 (Supplementary Table S1) containing the putative small ORFs STM14\_0419, STM14\_1274, STM14\_1559 and STM14\_5096. Broken arrows indicate transcriptional start sites<sup>28,37</sup>. The -10 promoter regions and potential ribosome binding sites (RBS) are underlined. Predicted start and stop codons are indicated in boxes.

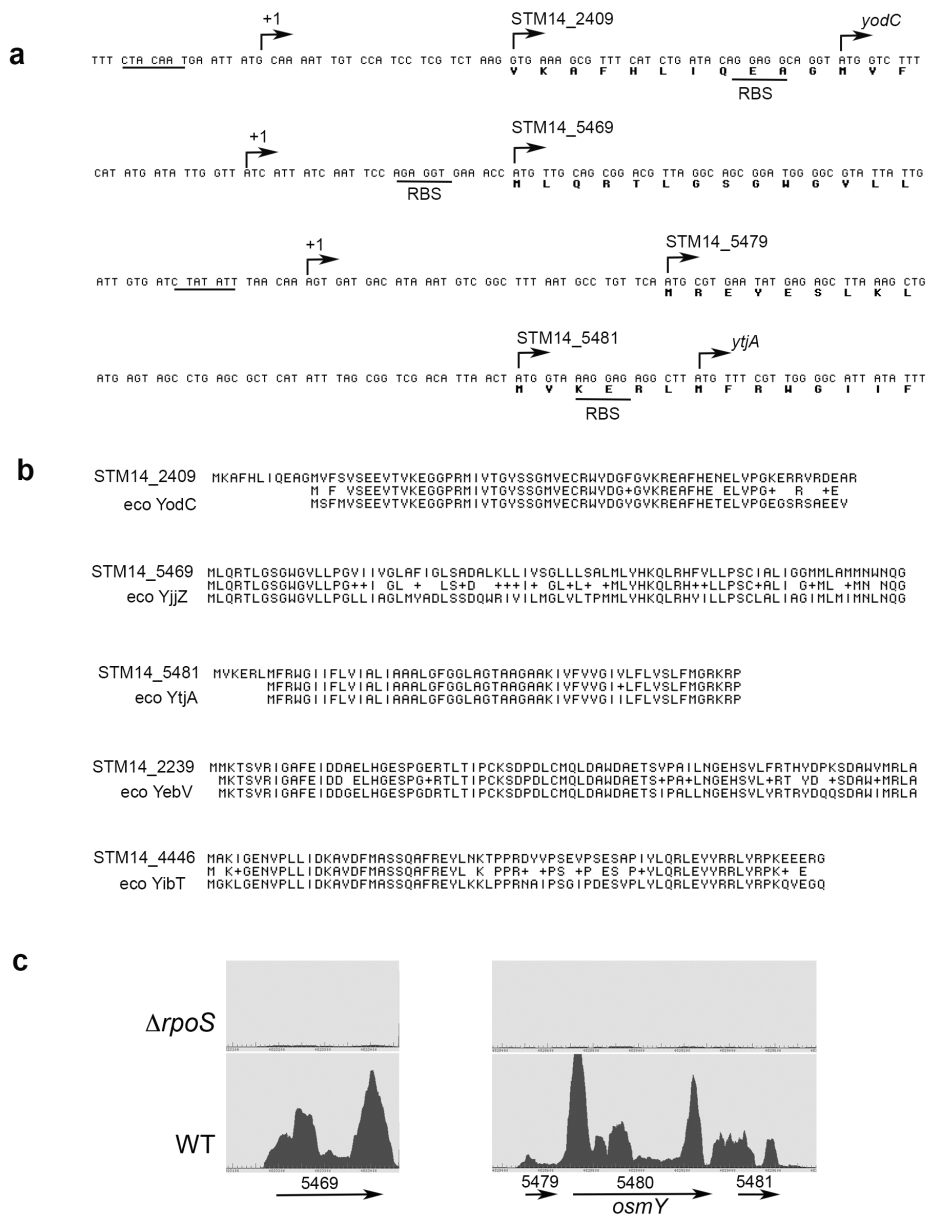

**Figure S5. Sequence features of uncharacterized small ORFs activated by  $\sigma^S$ .** (a) DNA sequences corresponding to the 5' ends and upstream regions of the  $\sigma^S$ -dependent small ORFs STM14\_2409, STM14\_5469, STM14\_5479 and STM14\_5481 (Table 1) are shown. Broken arrows indicate the 5' ends of ORFs and transcriptional start sites<sup>28,37</sup>. The -10 promoter regions and potential ribosome binding sites (RBS) are underlined. (b) Predicted amino acid sequences of the *Salmonella*  $\sigma^S$ -dependent small ORFs STM14\_2409, STM14\_5469, STM14\_5481, STM14\_2239 and STM14\_4446 (Table 1) are aligned with that of *E. coli* K12 (eco) homologs. The translation start sites for STM14\_2409/*yodC*, STM14\_5481/*yjtA* and STM14\_2239/*yebV* are likely located downstream of the annotated start codons (see also Supplementary Dataset S1). (c) RNA reads coverage in the STM14\_5469 and STM14\_5479 genomic regions. RNA reads, identified by RNA sequencing in the wild type (WT) and  $\Delta rpoS$  strains of ATCC14028, were mapped to genes of interest<sup>16</sup>. The annotated genes are indicated by the gene number in ATCC14028 and represented by arrows. Mapped reads were formatted into graph files for visualization at a strand-specific manner using COV2HTML<sup>79</sup>. STM14\_5469, STM14\_5479 and STM14\_5481 are small putative ORFs of unknown function. STM14\_5479 is located 36 bps downstream of the promoter of *osmY* (STM14\_5480)<sup>37</sup>, a gene regulated by  $\sigma^S$  (Supplementary Table S1).

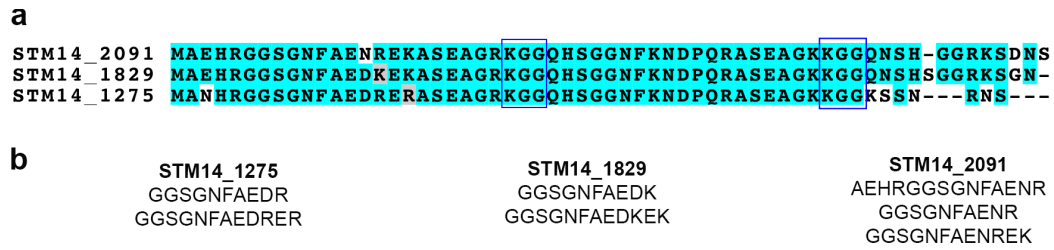

**Figure S6. Small paralogous  $\sigma^S$ -dependent genes.** (a) Alignment of the amino acid sequences of the small paralogous genes STM14\_2091/*yciG*, STM14\_1829 and STM14\_1275/*ymdF* (Table 1), generated with ClustalW<sup>80</sup>. Their products contain a KGG motif that is repeated in LEA (late embryogenesis abundant) family of proteins, playing roles as antioxidants and as membrane and protein stabilizers during extreme water stress<sup>81</sup>. (b) Peptides used for identification of the paralogous gene products by nLC-MS/MS.

|                         |                                          |
|-------------------------|------------------------------------------|
| STM14_0421              | TTGACTTGAAGGTTATCGTTTTACGTCTATCTTAACTTT  |
| STM14_0460              | TCGACGCAACGGTTACAGGGAGATGTCATACTTAACGCT  |
| STM14_1271              | GAAATTTGCACTCTTCACAGGAGAGCATATCTTTAAATAG |
| STM14_1275              | TAAGCGCCTACTACGACGTTTTTCACTATGCTTAATGTT  |
| STM14_1829              | TGAATTTGCACTGCGCACAGGGCGACTAGATTTAGAATC  |
| STM14_2091              | TCAATTTGACTAATCGGTTTAACCAACTAATTTTAATAGG |
| STM14_2173              | TTCAGAAATGCGACGCTCGACTTTGCCATACTTAAAACG  |
| STM14_2188              | AAAAACCAAAGTAGTGCTGTAGGGTATCTTTAATAACTA  |
| STM14_2189              | GCGCTCGCGCACGTATGGCGGCGACTCTATACTTTCAAAG |
| STM14_2239              | TGACTGGCGCTTTTGCCTACGTTGACTACGCTGAAAAATG |
| STM14_2405              | GCGTGTGCTGGTTTTCTCAACGGTCTATACTTAGGCTG   |
| STM14_2409              | ATTCGCGGTGTTTCGCACTGATTTTCTACAATGAATTATG |
| STM14_3597              | ATCCTGGCGAATTATGTAAAGGAGGTTATGCTGAATAATG |
| STM14_4398              | TCGCCCCCACCCGCAAGTTTCCCGACTATTCTTAAGAGG  |
| STM14_4446              | CCTCAATGACAACGCTAAATTGATCCTAAACTCAAATAAG |
| STM14_5097              | TATAAAACCGAAGGCCGAATTCCTGCCACAAATTATTATC |
| STM14_5469              | TGGCTGACAAATGAGAAAATATATCATATGATATTGGTTA |
| STnc1110/ <i>yncL</i>   | TTATTGCGGATCTCGCCAACCCGTACTATACCCATAGGGG |
| STnc1330/ <i>yohP</i>   | AAAGCAGCAGATGGCTTAATACTTTCCATACTTTGTTTG  |
| <i>IsrI</i> /STM14_3199 | CTAACGCCAACCTGCAATCCCAATAGCTAAACTCCTCTTA |

**Figure S7. Promoter sequences of  $\sigma^S$ -activated genes used to construct the logograph on Fig. 1d.** Promoter sequences (-39 to +1) are from<sup>28,37</sup>.

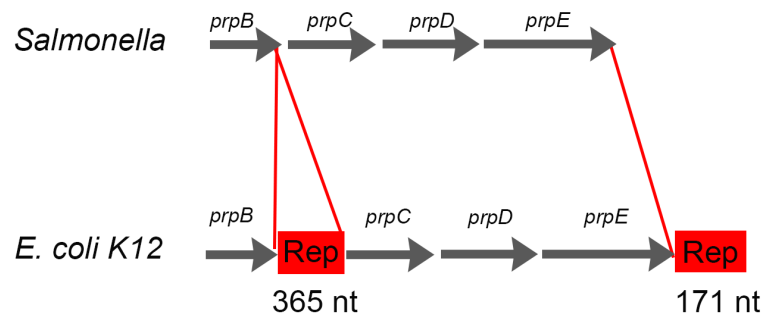

**Figure S8. Schematic representation of the structure of the *prpBCDE* locus in *E. coli* K12 and *S. Typhimurium*.** Compared to *S. Typhimurium*, the *E. coli* K12 *prp* operon contains additional repetitive extragenic palindromes (REP)<sup>82,83</sup>. The REP elements might stabilize and protect mRNA from RNase degradation<sup>83</sup>. The indicated objects are not drawn to scale.



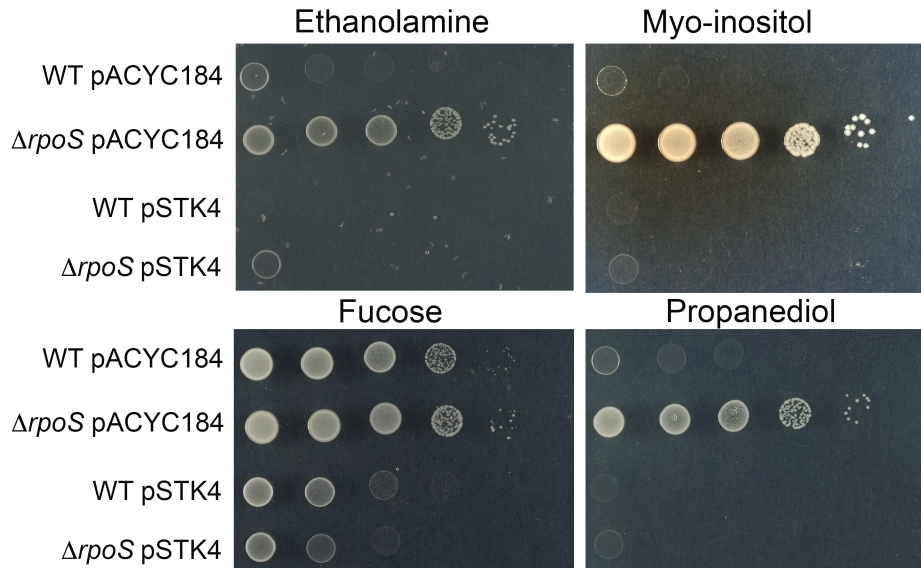

**Figure S9. Complementation of the  $\Delta rpoS$  mutation for growth at the expense of various carbon sources.** Empty vector pACYC184 and plasmid pSTK4 carrying the *rpoS* gene were used in complementation experiments of the  $\Delta rpoS$  mutation for growth at the expense of L-fucose, propanediol, ethanolamine and myo-inositol. Stationary phase cultures in LB were washed, resuspended in phosphate-buffered saline (PBS)<sup>54</sup> to OD<sub>600</sub> of 1.0, and 5  $\mu$ l of serial dilutions were spotted onto plates that were incubated at 37°C for 48 h.

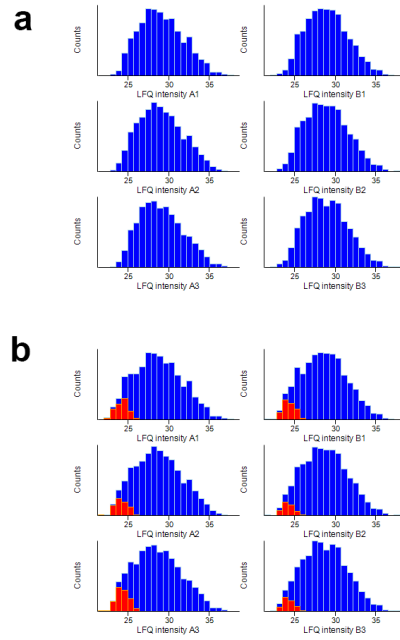

**Figure S10. Histogram-Intensity distribution.** Histogram of the LFQ intensity ( $\log_2$ ) distribution for each sample, considering the two different approaches without (a) and with (b) imputation (named respectively SI and AI approaches). Blue rods are experimental values and red rods are imputed values.

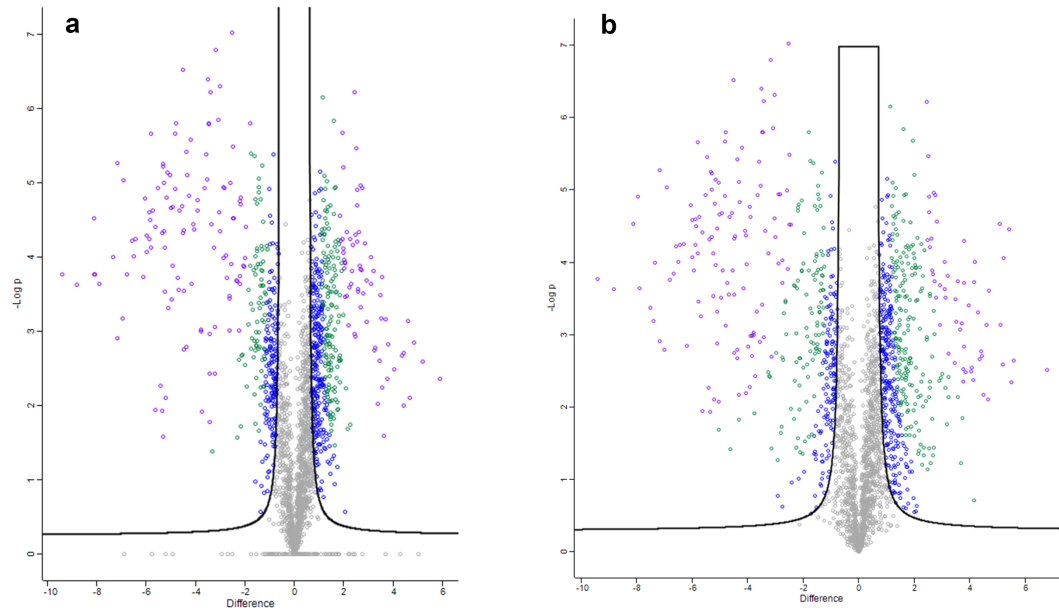

**Figure S11. Volcano-Plots.** Differences in LFQ intensity ( $\log_2$ ) were plotted against negative  $\log_{10}$  transformed p-values of the two-sided T-test for (a) the SI approach (without imputation) and (b) the AI approach (with imputation). Statistically significant proteins are represented by a circle colored according to the FDR value: Blue circle for FDR 5%, Green circle for FDR 1%, and purple circle for FDR 0.1%.

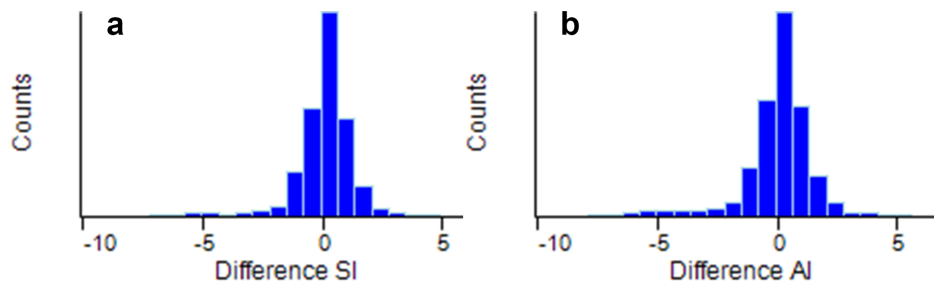

**Figure S12. LFQ difference distribution.** Histogram of the difference distribution for (a) the SI approach (without imputation) and (b) the AI approach (with imputation). Thereby, differences calculated from the LFQ intensities ( $\log_2$ ) are represented by slice in the X-axis, and the Y-axis represents the counting for each slices.

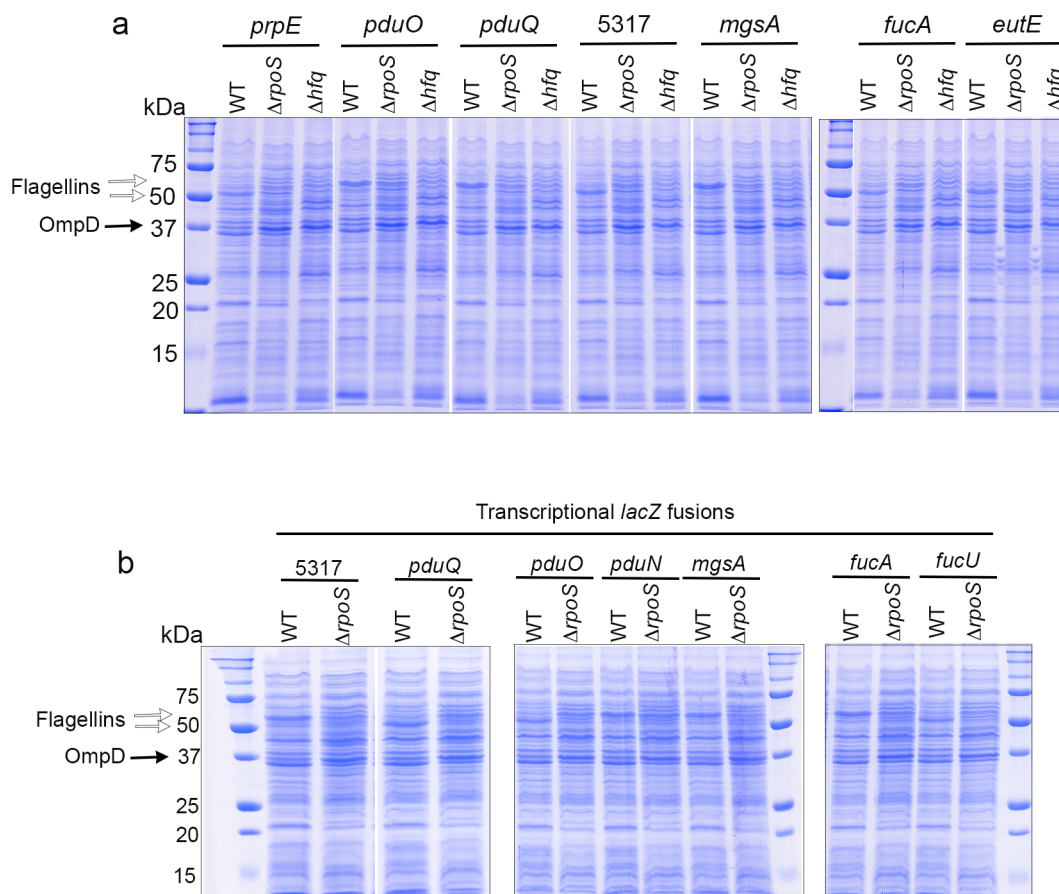

**Figure S13. Coomassie Blue<sup>54</sup> stained gels of protein samples used for immunodetection of 3xFlag-tagged proteins (Fig. 6).** (a) Effect of the  $\Delta hfq$  and  $\Delta rpoS$  mutations on production of Flag-tagged products of the indicated genes (Fig. 6a). (b) Effect of the  $\Delta rpoS$  mutation on expression of transcriptional *lacZ* fusions in the indicated genes (Fig. 6b). The white arrows show the two flagellin subunits, FliC and FljB, which are alternatively expressed in *Salmonella* by a site-specific DNA inversion mechanism called flagellar phase variation. The black arrow shows the OmpD protein, which is produced to higher levels in the  $\Delta rpoS$  mutant than the wild type strain of *Salmonella*<sup>17</sup>.

## Supplementary Tables

**Table S1. Genes expressed in stationary phase under the tight control of  $\sigma^{S16}$**  (highlighted in a box on Fig. S1)

| Gene identification |         |               |             | RNA-seq <sup>a</sup> |                     |                            | LC-MS/MS <sup>b</sup> |                            | Protein features<br>KEGG annotation and/or Refs                          | Expression in <i>hfg</i><br>mutant <sup>c</sup> | Hfq Binding <sup>44</sup> |
|---------------------|---------|---------------|-------------|----------------------|---------------------|----------------------------|-----------------------|----------------------------|--------------------------------------------------------------------------|-------------------------------------------------|---------------------------|
| ATCC14028           | LT2     | name          | length (nt) | Norm counts per gene | log <sub>2</sub> FC | -log <sub>10</sub> p-value | log <sub>2</sub> FC   | -log <sub>10</sub> p-value |                                                                          |                                                 |                           |
| STM14_0421          | STM0359 |               | 102         | 1,371                | -8.6                | 14.5                       | -5.7                  | 4.6                        | Putative cytoplasmic protein                                             | R <sup>43,44</sup>                              |                           |
| STM14_0428          | STM0366 | <i>yahO</i>   | 276         | 3,481                | -6.0                | 34.3                       | -4.3                  | 5.1                        | Periplasmic protein <sup>84,85</sup>                                     | R <sup>44</sup>                                 | Yes                       |
| STM14_0454          | STM0384 | <i>psiF</i>   | 321         | 1,117                | -6.6                | 19.6                       | -5.3                  | 5.0                        | Phosphate starvation inducible protein                                   | R <sup>43,44</sup>                              |                           |
| STM14_0460          | STM0389 | <i>yaiA</i>   | 192         | 1,222                | -4.0                | 6.2                        | Exclusive WT          |                            | Hypothetical protein                                                     | R <sup>44</sup>                                 |                           |
| STM14_0527          | STM0446 | <i>bolA</i>   | 318         | 5,474                | -5.6                | 33.8                       | -2.5                  | 7.0                        | Transcriptional regulator affecting cell morphology <sup>86</sup>        |                                                 | Yes                       |
| STM14_0883          | STM0759 | <i>ybgS</i>   | 387         | 10,343               | -9.5                | 62.3                       | -6.0                  | 4.1                        | Hypothetical protein                                                     | R <sup>43,44</sup>                              |                           |
| STM14_1271          | STM1118 | <i>yccJ</i>   | 228         | 9,007                | -4.1                | 11.9                       | -2.8                  | 4.0                        | Hypothetical protein                                                     | R <sup>43,44</sup>                              |                           |
| STM14_1272          | STM1119 | <i>wrbA</i>   | 597         | 4,432                | -5.4                | 32.0                       | -3.5                  | 5.8                        | NAD(P)H:quinone oxidoreductase, TrpR binding protein <sup>87</sup>       | R <sup>43</sup>                                 |                           |
| STM14_1275          | STM1121 | <i>ymdF</i>   | 168         | 8,115                | -6.8                | 13.4                       | -5.2                  | 3.5                        | Putative cytoplasmic protein                                             | R <sup>43,44</sup>                              |                           |
| STM14_1521          | STM1261 |               | 327         | 1,257                | -6.0                | 11.3                       | -5.5                  | 4.9                        | Putative cytoplasmic protein                                             | R <sup>43,44</sup>                              |                           |
| STM14_1558          | STM1285 | <i>yeaG</i>   | 1935        | 2,961                | -7.8                | 54.8                       | -4.9                  | 4.7                        | Serine protein kinase <sup>85,88</sup>                                   | R <sup>44</sup>                                 | Yes                       |
| STM14_1724          | STM1427 | <i>cfa</i>    | 1149        | 1,106                | -4.6                | 24.9                       | Exclusive WT          |                            | Cyclopropane-fatty-acyl-phospholipid synthase <sup>89,90</sup>           | R <sup>43,44</sup>                              |                           |
| STM14_1738          | STM1440 | <i>sodC_2</i> | 522         | 1,361                | -5.7                | 31.1                       | -4.5                  | 4.3                        | Superoxide dismutase <sup>91</sup>                                       | R <sup>44</sup>                                 |                           |
| STM14_1768          | STM1466 | <i>ydgA</i>   | 1509        | 1,080                | -4.0                | 19.5                       | -1.6                  | 4.0                        | Hypothetical protein                                                     |                                                 |                           |
| STM14_1829          | STM1513 |               | 183         | 5,431                | -8.4                | 8.4                        | -5.4                  | 2.3                        | Putative cytoplasmic protein                                             | R <sup>43,44</sup>                              |                           |
| STM14_1832          | STM1515 | <i>ydeI</i>   | 393         | 1,007                | -5.0                | 25.0                       | -4.8                  | 5.8                        | Involved in antimicrobial peptide resistance and virulence <sup>92</sup> | R <sup>43,44</sup>                              |                           |
| STM14_1886          | STM1563 | <i>osmC</i>   | 432         | 1,049                | -6.9                | 35.4                       | -5.1                  | 5.1                        | Osmotically inducible protein, oxidative stress resistance <sup>93</sup> | R <sup>44</sup>                                 |                           |
| STM14_1924          | STM1589 | <i>yncB</i>   | 1071        | 1,392                | -5.0                | 28.2                       | -3.9                  | 4.8                        | Putative NADP-dependent oxidoreductase                                   | R <sup>44</sup>                                 | Yes                       |
| STM14_2062          | STM1705 | <i>osmB</i>   | 219         | 11,034               | -3.9                | 19.2                       | Exclusive WT          |                            | Osmotically inducible lipoprotein <sup>94-96</sup>                       | R <sup>43,44</sup>                              |                           |
| STM14_2091          | STM1728 | <i>yciG</i>   | 183         | 41,351               | -8.6                | 17.7                       | -5.3                  | 1.9                        | Cytoplasmic protein <sup>33-35</sup>                                     | R <sup>43,44</sup>                              |                           |
| STM14_2092          | STM1729 | <i>yciF</i>   | 504         | 4,372                | -10.0               | 11.5                       | -5.6                  | 4.4                        | Cytoplasmic protein <sup>33,34</sup>                                     | R <sup>43,44</sup>                              |                           |
| STM14_2093          | STM1730 | <i>yciE</i>   | 507         | 3,307                | -10.1               | 6.9                        | -5.9                  | 4.2                        | Cytoplasmic protein <sup>33,34</sup>                                     | R <sup>43,44</sup>                              |                           |

|            |         |             |      |        |      |      |              |     |                                                                                   |                    |     |
|------------|---------|-------------|------|--------|------|------|--------------|-----|-----------------------------------------------------------------------------------|--------------------|-----|
| STM14_2094 | STM1731 | <i>katN</i> | 879  | 2,078  | -7.5 | 5.6  | -5.9         | 4.6 | Catalase <sup>33,34</sup>                                                         | R <sup>44</sup>    | Yes |
| STM14_2140 | STM1770 | <i>chaB</i> | 231  | 2,559  | -7.4 | 24.0 | -5.3         | 5.3 | Cation transport regulator <sup>97</sup>                                          | R <sup>43,44</sup> |     |
| STM14_2173 | STM1797 | <i>ymgE</i> | 255  | 1,577  | -6.3 | 32.0 | ND           |     | Putative protein                                                                  | R <sup>43,44</sup> |     |
| STM14_2188 | STM1810 |             | 138  | 11,025 | -5.0 | 23.7 | Exclusive WT |     | Putative cytoplasmic protein                                                      | R <sup>43</sup>    |     |
| STM14_2189 |         |             | 99   | 7,791  | -6.4 | 35.7 | ND           |     | Hypothetical protein                                                              |                    |     |
| STM14_2239 | STM1851 |             | 240  | 2,146  | -7.0 | 27.3 | -3.3         | 1.4 | Putative cytoplasmic protein                                                      | R <sup>43,44</sup> |     |
| STM14_2405 | STM1984 | <i>yodD</i> | 228  | 3,434  | -6.7 | 28.5 | -6.0         | 4.3 | Putative cytoplasmic protein                                                      | R <sup>44</sup>    |     |
| STM14_2409 | STM1988 |             | 219  | 1,363  | -3.9 | 16.2 | Exclusive WT |     | Putative cytoplasmic protein                                                      | R <sup>44</sup>    |     |
| STM14_2642 | STM2141 | <i>fbaB</i> | 1053 | 1,246  | -6.7 | 40.8 | -5.3         | 4.4 | Fructose-bisphosphate aldolase                                                    | R <sup>44</sup>    |     |
| STM14_2675 | STM2169 | <i>yohC</i> | 588  | 3,095  | -7.8 | 50.4 | ND           |     | Putative transport protein, membrane <sup>98</sup>                                | R <sup>44</sup>    |     |
| STM14_2849 | STM2311 | <i>elaB</i> | 312  | 3,856  | -6.6 | 39.6 | -4.9         | 3.9 | Inner membrane protein, binds stationary-phase ribosomes <sup>99</sup>            | R <sup>43,44</sup> |     |
| STM14_2958 | STM2405 |             | 1653 | 1,425  | -6.1 | 38.2 | -5.1         | 3.3 | Putative indolepyruvate decarboxylase                                             | R <sup>44</sup>    |     |
| STM14_3365 | STM2789 | <i>csiD</i> | 978  | 4,075  | -4.5 | 20.7 | -4.6         | 4.6 | Carbon-starvation inducible protein                                               |                    |     |
| STM14_3366 | STM2790 | <i>ygaF</i> | 1269 | 1,677  | -4.3 | 9.1  | -4.4         | 5.4 | L-2-hydroxyglutarate oxidase <sup>100,101</sup>                                   |                    |     |
| STM14_3371 | STM2795 | <i>ygaU</i> | 450  | 1,135  | -8.4 | 18.4 | -5.4         | 4.3 | Modulation of peptidoglycan cross linking, potassium sensor <sup>85,102,103</sup> | R <sup>43,44</sup> |     |
| STM14_3373 | STM2796 | <i>yqaE</i> | 159  | 1,557  | -6.5 | 25.6 | ND           |     | Pmp3 family membrane protein <sup>104-106</sup>                                   | I <sup>43</sup>    | Yes |
| STM14_3383 | STM2802 | <i>ygaM</i> | 339  | 1,757  | -7.2 | 7.3  | -7.2         | 2.9 | Inner membrane protein, binds stationary-phase ribosomes <sup>99</sup>            | R <sup>44</sup>    |     |
| STM14_3458 | STM2861 | <i>sitA</i> | 918  | 7,344  | -5.0 | 29.0 | -4.1         | 4.4 | Manganese/iron transport; substrate-binding protein <sup>107,108</sup>            |                    |     |
| STM14_3459 | STM2862 | <i>sitB</i> | 822  | 3,637  | -5.5 | 32.8 | -5.0         | 4.7 | Manganese/iron transport ; ATP-binding protein <sup>107,108</sup>                 |                    |     |
| STM14_3460 | STM2863 | <i>sitC</i> | 861  | 2,037  | -4.9 | 26.9 | ND           |     | Manganese/iron transport ; permease <sup>107,108</sup>                            |                    |     |
| STM14_3461 | STM2864 | <i>sitD</i> | 849  | 1,156  | -5.0 | 27.2 | ND           |     | Manganese/iron transport permease <sup>107,108</sup>                              | R <sup>44</sup>    |     |
| STM14_3557 | STM2952 | <i>eno</i>  | 1299 | 3,685  | -3.7 | 10.3 | -0.8         | 3.6 | Phosphopyruvate hydratase                                                         |                    | Yes |
| STM14_3597 | STM2983 | <i>ygdI</i> | 228  | 8,208  | -6.3 | 39.5 | -5.2         | 4.1 | Putative lipoprotein                                                              | R <sup>44</sup>    | Yes |
| STM14_3896 | STM3218 | <i>oat</i>  | 1407 | 4,269  | -7.4 | 51.2 | -7.0         | 3.2 | Putrescine--2-oxoglutarate aminotransferase                                       |                    |     |
| STM14_3910 | STM3228 | <i>yqjC</i> | 369  | 3,928  | -5.2 | 30.0 | -2.2         | 1.7 | Hypothetical protein                                                              | R <sup>43,44</sup> | Yes |
| STM14_3911 | STM3229 | <i>yqjD</i> | 306  | 2,589  | -4.6 | 23.7 | -2.6         | 3.5 | Inner membrane protein, binds stationary-phase ribosomes <sup>99</sup>            | R <sup>43</sup>    | Yes |
| STM14_3912 | STM3230 | <i>yqjE</i> | 399  | 2,367  | -4.4 | 14.9 | ND           |     | Putative inner membrane protein                                                   | R <sup>43,44</sup> | Yes |
| STM14_3951 | STM3269 | <i>yhbO</i> | 519  | 1,463  | -7.4 | 41.9 | -5.8         | 4.1 | Glyoxalase <sup>109-111</sup>                                                     | R <sup>44</sup>    |     |
| STM14_4398 | STM3648 | <i>viaG</i> | 291  | 3,687  | -7.5 | 45.1 | Exclusive WT |     | Putative transcriptional regulator                                                | R <sup>44</sup>    |     |
| STM14_4438 | STM3680 | <i>aldB</i> | 1539 | 4,797  | -5.1 | 31.3 | -3.2         | 6.8 | Aldehyde dehydrogenase                                                            | R <sup>44</sup>    | Yes |
| STM14_4446 | STM3688 |             | 210  | 1,004  | -5.4 | 5.2  | -2.4         | 4.5 | Putative cytoplasmic protein                                                      | R <sup>44</sup>    |     |
| STM14_5097 | STM4240 | <i>yjbJ</i> | 213  | 38,314 | -8.4 | 59.9 | -5.8         | 5.7 | Putative stress-response protein                                                  | R <sup>43,44</sup> | Yes |
| STM14_5216 | STM4336 | <i>ecnB</i> | 147  | 21,899 | -8.0 | 53.9 | ND           |     | Bacteriolytic lipoprotein entericidin B <sup>112</sup>                            | R <sup>44</sup>    | Yes |
| STM14_5292 | STM4406 | <i>ytfK</i> | 207  | 22,625 | -4.1 | 21.4 | ND           |     | Putative cytoplasmic protein                                                      |                    | Yes |
| STM14_5430 | STM4519 |             | 1371 | 1,510  | -8.4 | 53.7 | -5.3         | 5.2 | Putative NAD-dependent aldehyde dehydrogenase                                     | R <sup>44</sup>    |     |
| STM14_5469 | STM4552 |             | 237  | 6,492  | -5.4 | 30.6 | ND           |     | Putative inner membrane protein                                                   | R <sup>43</sup>    |     |
| STM14_5479 |         |             | 135  | 1,014  | -7.5 | 2.9  | ND           |     | Hypothetical protein                                                              |                    |     |
| STM14_5480 | STM4561 | <i>osmY</i> | 618  | 3,878  | -7.1 | 46.0 | -4.8         | 4.9 | Hypothetical protein <sup>113</sup>                                               | R <sup>44</sup>    | Yes |

|            |         |             |     |       |      |      |      |     |                                                                      |                    |     |
|------------|---------|-------------|-----|-------|------|------|------|-----|----------------------------------------------------------------------|--------------------|-----|
| STM14_5481 | STM4562 |             | 180 | 2,329 | -6.9 | 34.9 | ND   |     | Hypothetical protein                                                 | R <sup>43</sup>    | Yes |
| STM14_966  | STM0831 | <i>dps</i>  | 504 | 1,499 | -4.6 | 14.5 | -2.2 | 3.0 | DNA stationary phase protection protein, ferritin <sup>114,115</sup> | R <sup>43,44</sup> | Yes |
| STM14_998  | STM0853 | <i>bssR</i> | 384 | 8,127 | -5.3 | 32.4 | -3.2 | 3.1 | BssR/YliH biofilm formation regulator <sup>116</sup>                 | R <sup>43</sup>    |     |

Gene identification and annotations are from KEGG (<http://www.genome.jp/kegg/kegg2.html>) and the indicated references.

<sup>a</sup> : RNA-seq data included for comparison are from Lévi-Meyreus *et al.*<sup>16</sup>

<sup>b</sup> : Detailed MS data are provided in Supplementary Datasets S2 and S3. Fold changes ( $\log_2$ ) in expression levels between the  $\Delta rpoS$  mutant and the wild-type strains are indicated with the p-values ( $-\log_{10}$ ). ND : protein Not Detected.

<sup>c</sup>: R: reduced; I: increased



**Table S2. Bacterial strains and plasmids used in this study.**

| Strain or Plasmid | Characteristics                                                            | Source or reference                      |
|-------------------|----------------------------------------------------------------------------|------------------------------------------|
| VF6910            | ATCC14028 <i>Salmonella enterica</i> serovar Typhimurium, wild-type strain | American Type Culture Collection         |
| VF7928            | ATCC14028 $\Delta rpoS::Cm$                                                | <sup>4</sup>                             |
| VF8158            | VF7928 with the Cm cassette eliminated                                     | <sup>4</sup>                             |
| VFC331            | ATCC14028 $\Delta rpoS$ (scarless in frame deletion of <i>rpoS</i> )       | <sup>16</sup>                            |
| VF8461            | MA7224                                                                     | <sup>70</sup> gift of N. Figueroa-Bossi  |
| VF7985            | ATCC14028 $\Delta prpB::Cm$                                                | This study                               |
| VFC47             | VF8158 $\Delta prpB::Cm$                                                   | This study                               |
| VFA693            | MA7791 $\Delta hfq67::cat$                                                 | <sup>117</sup> gift of N. Figueroa-Bossi |
| VFA714            | ATCC14028 $\Delta hfq67::cat$                                              | This study                               |
| VFC45             | ATCC14028 STM14_0421-3xflag::Km                                            | This study                               |
| VFD182            | ATCC14028 STM14_0460-3xflag::Km                                            | This study                               |
| VFB990            | ATCC14028 STM14_1271-3xflag::Km                                            | This study                               |
| VFB572            | ATCC14028 STM14_1275-3xflag::Km                                            | This study                               |
| VFB818            | ATCC14028 STM14_1829-3xflag::Km                                            | This study                               |
| VFB503            | ATCC14028 STM14_2091-3xflag::Km                                            | This study                               |
| VFF503            | ATCC14028 STM14_2173-3xflag::Km                                            | This study                               |
| VFD106            | ATCC14028 STM14_2189-3xflag::Km                                            | This study                               |
| VFD100            | ATCC14028 STM14_2239-3xflag::Km                                            | This study                               |
| VFD108            | ATCC14028 STM14_2405-3xflag::Km                                            | This study                               |
| VFD190            | ATCC14028 STM14_2409-3xflag::Km                                            | This study                               |
| VFD926            | ATCC14028 STM14_3597-3xflag::Km                                            | This study                               |
| VFD112            | ATCC14028 <i>yohP</i> -3xflag::Km                                          | This study                               |
| VFD94             | ATCC14028 STM14_4398-3xflag::Km                                            | This study                               |
| VFD192            | ATCC14028 STM14_4446-3xflag::Km                                            | This study                               |
| VFB987            | ATCC14028 STM14_5097-3xflag::Km                                            | This study                               |
| VFD194            | ATCC14028 STM14_5292-3xflag::Km                                            | This study                               |
| VFB927            | ATCC14028 STM14_5481-3xflag::Km                                            | This study                               |
| VFF628            | ATCC14028 <i>eutE</i> -3xflag::Km                                          | This study                               |
| VFF622            | ATCC14028 <i>pduO</i> -3xflag::Km                                          | This study                               |
| VFF626            | ATCC14028 <i>pduQ</i> -3xflag::Km                                          | This study                               |
| VFF616            | ATCC14028 <i>fucU</i> -3xflag::Km                                          | This study                               |
| VFF618            | ATCC14028 <i>fucA</i> -3xflag::Km                                          | This study                               |
| VFF620            | ATCC14028 <i>fucO</i> -3xflag::Km                                          | This study                               |
| VFF638            | ATCC14028 <i>mgsA</i> -3xflag::Km                                          | This study                               |
| VFF642            | ATCC14028 STM14_5317-3xflag::Km                                            | This study                               |
| VFF640            | ATCC14028 STM14_5326-3xflag::Km                                            | This study                               |
| VFD71             | VFC331 STM14_0421-3xflag::Km                                               | This study                               |
| VFD183            | VFC331 STM14_0460-3xflag::Km                                               | This study                               |
| VFD68             | VFC331 STM14_1271-3xflag::Km                                               | This study                               |
| VFD64             | VFC331 STM14_1275-3xflag::Km                                               | This study                               |
| VFD65             | VFC331 STM14_1829-3xflag::Km                                               | This study                               |
| VFD63             | VFC331 STM14_2091-3xflag::Km                                               | This study                               |
| VFF504            | VFC331 STM14_2173-3xflag::Km                                               | This study                               |
| VFD107            | VFC331 STM14_2189-3xflag::Km                                               | This study                               |
| VFD101            | VFC331 STM14_2239-3xflag::Km                                               | This study                               |
| VFD109            | VFC331 STM14_2405-3xflag::Km                                               | This study                               |
| VFD191            | VFC331 STM14_2409-3xflag::Km                                               | This study                               |
| VFD66             | VFC331 STM14_3597-3xflag::Km                                               | This study                               |
| VFD113            | VFC331 <i>yohP</i> -3xflag::Km                                             | This study                               |
| VFD95             | VFC331 STM14_4398-3xflag::Km                                               | This study                               |
| VFD193            | VFC331 STM14_4446-3xflag::Km                                               | This study                               |
| VFD69             | VFC331 STM14_5097-3xflag::Km                                               | This study                               |
| VFD195            | VFC331 STM14_5292-3xflag::Km                                               | This study                               |
| VFD67             | VFC331 STM14_5481-3xflag::Km                                               | This study                               |
| VFF629            | VFC331 <i>eutE</i> -3xflag::Km                                             | This study                               |
| VFF623            | VFC331 <i>pduO</i> -3xflag::Km                                             | This study                               |
| VFF627            | VFC331 <i>pduQ</i> -3xflag::Km                                             | This study                               |

|                 |                                                    |            |
|-----------------|----------------------------------------------------|------------|
| VFF617          | VFC331 <i>fucU</i> -3xflag::Km                     | This study |
| VFF619          | VFC331 <i>fucA</i> -3xflag::Km                     | This study |
| VFF621          | VFC331 <i>fucO</i> -3xflag::Km                     | This study |
| VFF639          | VFC331 <i>mgsA</i> -3xflag::Km                     | This study |
| VFF643          | VFC331 STM14_5317-3xflag::Km                       | This study |
| VFF641          | VFC331 STM14_5326-3xflag::Km                       | This study |
| VFD320          | ATCC14028 <i>prpE-lac36</i>                        | This study |
| VFD328          | ATCC14028 <i>prpE-lac40</i>                        | This study |
| VFF544          | ATCC14028 STM14_5292- <i>lac36</i>                 | This study |
| VFF435          | ATCC14028 STM14_5292- <i>lac40</i>                 | This study |
| VFF706          | ATCC14028 STM14_1932- <i>lac40</i>                 | This study |
| VFF702          | ATCC14028 STM14_3199- <i>lac40</i>                 | This study |
| VFF710          | ATCC14028 STM14_5469- <i>lac40</i>                 | This study |
| VFF698          | ATCC14028 STM14_5479- <i>lac40</i>                 | This study |
| VFD321          | VF8158 <i>prpE-lac36</i>                           | This study |
| VFD329          | VF8158 <i>prpE-lac40</i>                           | This study |
| VFF545          | VF8158 STM14_5292- <i>lac36</i>                    | This study |
| VFF436          | VF8158 STM14_5292- <i>lac40</i>                    | This study |
| VFF707          | VF8158 STM14_1932- <i>lac40</i>                    | This study |
| VFF703          | VF8158 STM14_3199- <i>lac40</i>                    | This study |
| VFF711          | VF8158 STM14_5469- <i>lac40</i>                    | This study |
| VFD321          | VF8158 <i>prpE-lac36</i>                           | This study |
| VFD329          | VF8158 <i>prpE-lac40</i>                           | This study |
| VFF545          | VF8158 STM14_5292- <i>lac36</i>                    | This study |
| VFF436          | VF8158 STM14_5292- <i>lac40</i>                    | This study |
| VFF707          | VF8158 STM14_1932- <i>lac40</i>                    | This study |
| VFF703          | VF8158 STM14_3199- <i>lac40</i>                    | This study |
| VFF711          | VF8158 STM14_5469- <i>lac40</i>                    | This study |
| VFF699          | VF8158 STM14_5479- <i>lac40</i>                    | This study |
| VFF583          | ATCC14028 <i>prpE</i> -3xflag::Km                  | This study |
| VFF584          | VFC331 <i>prpE</i> -3xflag::Km                     | This study |
| VFF972          | VFA714 <i>prpE</i> -3xflag::Km                     | This study |
| VFF978          | VFA714 <i>eutE</i> -3xflag::Km                     | This study |
| VFF976          | VFA714 <i>pduO</i> -3xflag::Km                     | This study |
| VFF977          | VFA714 <i>pduQ</i> -3xflag::Km                     | This study |
| VFF974          | VFA714 <i>fucA</i> -3xflag::Km                     | This study |
| VFF979          | VFA714 <i>mgsA</i> -3xflag::Km                     | This study |
| VFF981          | VFA714 STM14_5317-3xflag::Km                       | This study |
| VFF751          | ATCC14028 <i>pduO</i> -3xflag- <i>lac36</i>        | This study |
| VFF755          | ATCC14028 <i>pduQ</i> -3xflag- <i>lac36</i>        | This study |
| VFF753          | ATCC14028 <i>pduN</i> -3xflag- <i>lac36</i>        | This study |
| VFF767          | ATCC14028 <i>mgsA</i> -3xflag- <i>lac3</i>         | This study |
| VFF747          | ATCC14028 <i>fucA</i> -3xflag- <i>lac36</i>        | This study |
| VFF745          | ATCC14028 <i>fucU</i> -3xflag- <i>lac36</i>        | This study |
| VFF771          | ATCC14028 STM14_5317-3xflag- <i>lac36</i>          | This study |
| VFF752          | VF8158 <i>pduO</i> -3xflag- <i>lac36</i>           | This study |
| VFF756          | VF8158 <i>pduQ</i> -3xflag- <i>lac36</i>           | This study |
| VFF754          | VF8158 <i>pduN</i> -3xflag- <i>lac36</i>           | This study |
| VFF768          | VF8158 <i>mgsA</i> -3xflag- <i>lac3</i>            | This study |
| VFF748          | VF8158 <i>fucA</i> -3xflag- <i>lac36</i>           | This study |
| VFF746          | VF8158 <i>fucU</i> -3xflag- <i>lac36</i>           | This study |
| FF772           | VF8158 STM14_5317-3xflag- <i>lac36</i>             | This study |
| <b>Plasmids</b> |                                                    |            |
| pACYC184        | Cloning vector, Cm <sup>R</sup> , Tet <sup>R</sup> | 118        |
| pSTK4           | <i>rpoS</i> cloned into pACYC184, Cm <sup>R</sup>  | 119        |

**Table S3. Oligonucleotides used in this study.**

| <b>Name</b>        | <b>Sequence (5' – 3')</b>                                                 | <b>Construction</b>     |
|--------------------|---------------------------------------------------------------------------|-------------------------|
| STM14_0421-3FlagFw | CAGAGTCGGGCGATAAGCCTGACAGCCAGCCGCAAAAAA<br>AATCGGACTACAAAGACCATGACGG      | STM14_0421-3xFlag::Km   |
| STM14_0421-3FlagRv | CGAAACGGTTATTTCCCAAACGTATAAACGTCGGGGAA<br>TATCCACATATGAATATCCTCCTTAG      | STM14_0421-3xFlag::Km   |
| STM14_0460-3FlagFw | AGCGATGGATGCGAAAAATCGTTACGAAGATCCGGATAAA<br>TCAGACTACAAAGACCATGACGG       | STM14_0460-3xFlag::Km   |
| STM14_0460-3FlagRv | TTTAGGGGTACTCAGAATCCCTCCGAGTGGTTCATGCGTC<br>TACATATGAATATCCTCCTTAG        | STM14_0460-3xFlag::Km   |
| STM14_1271-3FlagFw | GACTCGCTTCTGGGGCGAACAAATCATCGAACGTAAAA<br>ACGTAGACTACAAAGACCATGACGG       | STM14_1271-3xFlag::Km   |
| STM14_1271-3FlagRv | GAACACTGCTGCAAAAATAGCCATATGCCCCGCGCAGGCG<br>GGGGCGCATATGAATATCCTCCTTAG    | STM14_1271-3xFlag::Km   |
| STM14_1275-3FlagFw | CGAAGCAGGCAAAAAAGGGGGCAAAAAGCAGTAACCGTAA<br>TAGCGACTACAAAGACCATGACGG      | STM14_1275-3xFlag::Km   |
| STM14_1275-3FlagRv | GACACTTTTACGCGGAAACGCTCAGCGTCTGCTGTTGTG<br>ACATATGAATATCCTCCTTAG          | STM14_1275-3xFlag::Km   |
| STM14_1829-3FlagFw | GGTGGCCAAAATAGCCACAGTGGTGACGAAATCCGGCA<br>ATGACTACAAAGACCATGACGG          | STM14_1829-3xFlag::Km   |
| STM14_1829-3FlagRv | CGTATGTGCAATATTTTTCAGAAATATATTTATGAAATATCAGC<br>ACATATGAATATCCTCCTTAG     | STM14_1829-3xFlag::Km   |
| STM14_2091-3FlagFw | GGTGGTCAGAATAGTCACGGCGGACGTAAATCCGATAATT<br>CCGACTACAAAGACCATGACGG        | STM14_2091-3xFlag::Km   |
| STM14_2091-3FlagRv | CTCGCAGATTGCTTGATAAAAGCATGTGTTATATTTACATT<br>ACCATATGAATATCCTCCTTAG       | STM14_2091-3xFlag::Km   |
| STM14_2173-3FlagFw | CGCGATCGTGGTGCTGGTGATTTCCGCCTTCTGCGACGCG<br>GCGACATCAAAGACCATGACGG        | STM14_2173-3xFlag::Km   |
| STM14_2173-3FlagRv | CCGGTGCTGACCGGGTCAACGCTTACACGTTCTGCAGCGG<br>TTACATATGAATATCCTCCTTAG       | STM14_2173-3xFlag::Km   |
| STM14_2189-3FlagFw | GACACCCGAAGACGAAGGAAAAAATCCAAAGAAAAACCA<br>AAAGGACTACAAAGACCATGACGG       | STM14_2189-3xFlag::Km   |
| STM14_2189-3FlagRv | GCCTCCAACGAACCATAGTTATTAAGATACCCTACAGCA<br>CTACATATGAATATCCTCCTTAG        | STM14_2189-3xFlag::Km   |
| STM14_2239-3FlagFw | TCATTACGATCCTAAATCTGATGCCTGGGTCATGCGTCTTG<br>CCGACTACAAAGACCATGACGG       | STM14_2239-3xFlag::Km   |
| STM14_2239-3FlagRv | GAAGAATAAATAACCCGCTGGCGACGGGTTCTTTTTGAG<br>TCACATATGAATATCCTCCTTAG        | STM14_2239-3xFlag::Km   |
| STM14_2405-3FlagFw | CGAGCTGGATATTCATGATTTTAGTGTAACAGAAGTAAAC<br>CGTGACTACAAAGACCATGACGG       | STM14_2405-3xFlag::Km   |
| STM14_2405-3FlagRv | GTATCCCGACCCGTAGGGCCGGGATTTTTTCGGCCATTTT<br>TACATATGAATATCCTCCTTAG        | STM14_2405-3xFlag::Km   |
| STM14_2409-3FlagFw | GCTCGTGCCAGGCAAGGAAAGGCGCGTGCGGGACGAAGC<br>CCGAGACTACAAAGACCATGACGG       | STM14_2409-3xFlag::Km   |
| STM14_2409-3FlagRv | TTCTCCACAGCAAAACGCCCGCATAAACC GGCGTTTTGT<br>CACATATGAATATCCTCCTTAG        | STM14_2409-3xFlag::Km   |
| STM14_3597-3FlagFw | GCAGATCAATCGTACTGACGTGAAAGAGATGGTGGCTCTG<br>GAAAACGACTACAAAGACCATGACGG    | STM14_3597-3xFlag::Km   |
| STM14_3597-3FlagRv | GTTGATTAATGTAGCACCGCCATATTGCGGTGCTTTTTTTG<br>TATAACCATATGAATATCCTCCTTAG   | STM14_3597-3xFlag::Km   |
| STnc1330-FlagFw    | GATTGGGCTGTGGTGGTAACGGGCGTGTTTAAGATGATTT<br>TCGACTACAAAGACCATGACGG        | <i>yohP</i> -3xFlag::Km |
| STnc1330-3FlagRv   | ACGTGTGCCGGGCAGATACTATCGCTGCCCGGCGCAGGAA<br>TCACATATGAATATCCTCCTTAG       | <i>yohP</i> -3xFlag::Km |
| STM14_4398-3FlagFw | CCTGATACAGGCGAACCCACGCTTAAGTAAGCAATTGATG<br>GAGGACTACAAAGACCATGACGG       | STM14_4398-3xFlag::Km   |
| STM14_4398-3FlagRv | GTCCTTACGCAGGACCGTTAAAAACAGAAAAGGGGTA AAAA<br>TTACATATGAATATCCTCCTTAG     | STM14_4398-3xFlag::Km   |
| STM14_4446-3FlagFw | ATATTACGGCGGCTGTACCCACAAAAGAAGAAGAAAAG<br>AGGTGACTACAAAGACCATGACGG        | STM14_4446-3xFlag::Km   |
| STM14_4446-3FlagRv | AATCAGCTTAAAAAAGGCCTTTCAAAAAGTAAATCCCGCTG<br>TTACATATGAATATCCTCCTTAG      | STM14_4446-3xFlag::Km   |
| STM14_5097-3FlagFw | GGAAAAAGAGGTTGTTGACTGGGAAACCGTAACA ACTAT<br>CGCTGGGACTACAAAGACCATGACGG    | STM14_5097-3xFlag::Km   |
| STM14_5097-3FlagRv | CATAAGCAAACAGGGGGAAGCCTATCCATGTA CTCTCTGGT<br>AGGGGAACATATGAATATCCTCCTTAG | STM14_5097-3xFlag::Km   |
| STM14_5292-3FlagFw | TGAAGTTAACCGTCAGGTTATGCGTCTGCAA ACTGAGATG<br>GCGGACTACAAAGACCATGACGG      | STM14_5292-3xFlag::Km   |
| STM14_5292-3FlagRv | TTTTTTTTTACTTTTTTAACTACTGCATAGCACTTTTGGTT<br>ACATATGAATATCCTCCTTAG        | STM14_5292-3xFlag::Km   |
| STM14_5481-3FlagFw | CGTGCTTCTCTGGTCAGCCTGTTTCATGGCCGTAAACGAC<br>CCGACTACAAAGACCATGACGG        | STM14-5481-3xFlag::Km   |

|                    |                                                                       |                                               |
|--------------------|-----------------------------------------------------------------------|-----------------------------------------------|
| STM14_5481-3FlagRv | GTAAAAGCCAGTCCGCTGGACTGGCTTGATAGCAATATATCTTTACAGACATATGAATATCCTCCTTAG | STM14-5481-3xFlag::Km                         |
| prpE-P1-2          | GGAGAGCGTGATGCTTTTAGCGAATTTTATCAGCGTTCCA TTGTGTAGGCTGGAGCTGCTTC       | transcriptional <i>prpE-lac36</i> fusion      |
| prpE-P2-2          | CAGTCGCTGAGTCTAACCCGTTGCCGAACGCGGCTTATCCG GCCATATGAATATCCTCCTTAG      | transcriptional <i>prpE-lac36</i> fusion      |
| prpE-P1R-1         | CAGTCGCTGAGTCTAACCCGTTGCCGAACGCGGCTTATCCG GCGTGTAGGCTGGAGCTGCTTC      | translational <i>prpE-lac40</i> fusion        |
| prpE-P4-1          | GGAGAGCGTGATGCTTTTAGCGAATTTTATCAGCGTTCCA TTATTCCGGGATCCGTCGACC        | translational <i>prpE-lac40</i> fusion        |
| prpB-P1            | CGCCGGGGCAGGCATTTCCGCGCCGCTCGCTAAAGAGAA TCCGTGTAGGCTGGAGCTGCTTC       | $\Delta$ <i>prpB</i> ::Cm                     |
| prpB-P2            | CCTGTACAGCGCTCCAGCTTCTTTCGAACTGGTAGTAAT TGCATATGAATATCCTCCTTAG        | $\Delta$ <i>prpB</i> ::Cm                     |
| eutE-3FlagFw       | GCGGCTGCGTCGATGCGTGTGGTGGATGCGTTTCGCATTG TAGACTACAAAGACCATGACGG       | <i>eutE</i> -3xFlag::Km                       |
| eutE-3FlagRv       | GGTGAGCCAGAGTTGTTTCGTCGTGCGCCATGAGTCATCCCT TACATATGAATATCCTCCTTAG     | <i>eutE</i> -3xFlag::Km                       |
| pduO-3FlagFw       | AGCACAGACCGCCATCGCGGCTATTAACGTGGAACTCAT CAAGACTACAAAGACCATGACGG       | <i>pduO</i> -3xFlag::Km                       |
| pduO-3FlagRv       | CTAAGAATGGTGCGAATCAGGGTTTCGAGTTCAGAAGTAT TCACATATGAATATCCTCCTTAG      | <i>pduO</i> -3xFlag::Km                       |
| pduQ-3FlagFw       | GGCCAATGCCGAAGCATTCCGGAACTGCTGGAGGAACTG CTAGACTACAAAGACCATGACGG       | <i>pduQ</i> -3xFlag::Km                       |
| pduQ-3FlagRv       | TCGGCGCTAAGGGACATTTCAACGCTGTTGATGGCGGTGC TCACATATGAATATCCTCCTTAG      | <i>pduQ</i> -3xFlag::Km                       |
| fucU-3FlagFw       | CGCGAAGTACGGAAATATTCTTTTAAAAAAGGGGTAACG CCGGACTACAAAGACCATGACGG       | <i>fucU</i> -3xFlag::Km                       |
| fucU-3FlagRv       | TCGATGAACCGCCGCTCATGCGGGCGCACCGGCAAGAGA TTACATATGAATATCCTCCTTAG       | <i>fucU</i> -3xFlag::Km                       |
| fucA-3FlagFw       | CGTACTGGAGAAATTTAAAACCTACGGATTACGTATTGAA GAGGACTACAAAGACCATGACGG      | <i>fucA</i> -3xFlag::Km                       |
| fucA-3FlagRv       | ATTCAGAATCATTCTGTTTCGCCATCGCTGTCTCCTGACAT CACATATGAATATCCTCCTTAG      | <i>fucA</i> -3xFlag::Km                       |
| fucO-3FlagFw       | AGCGAGTCTGGCGGACATTGTCGAACTGTATCATACCGCC TGGGACTACAAAGACCATGACGG      | <i>fucO</i> -3xFlag::Km                       |
| fucO-3FlagRv       | CGAAATGTAGAGCGATAAGCGCAGCGCATCCGGCAAAA ATTACATATGAATATCCTCCTTAG       | <i>fucO</i> -3xFlag::Km                       |
| mgsA-3FlagFw       | TCTTATTCCGGATTATGCGGTTATCTGGCCGAGCGCCTGA AAGACTACAAAGACCATGACGG       | <i>mgsA</i> -3xFlag::Km                       |
| mgsA-3FlagRv       | CCTAAAGCGCGGGCGGTACAGCATCCCGCCCGTAGCGT TTACATATGAATATCCTCCTTAG        | <i>mgsA</i> -3xFlag::Km                       |
| prpE-3FlagFw       | CGATCCCGCTCGTTGCAGCAAATTCGCCAGGCGATCGAA GAAGACTACAAAGACCATGACGG       | <i>prpE</i> -3xFlag::Km                       |
| prpE-3FlagRv       | AGTCTAACCCGTTGCCGAACGCGGCTTATCCGGCTTACGGC TACATATGAATATCCTCCTTAG      | <i>prpE</i> -3xFlag::Km                       |
| STM14_5317-3FlagFw | TACCGAGATTGTTGAATTACCCTCAAAACCTGATTCTACA AAGACTACAAAGACCATGACGG       | STM14_5317-3xFlag::Km                         |
| STM14_5317-3FlagRv | AAGCATCGCTATCCGGCAGGTTTAAATACGCGGAAGGT TTACATATGAATATCCTCCTTAG        | STM14_5317-3xFlag::Km                         |
| STM14_5326-3FlagFw | AATAGAGGAACAAATTAATCGCAGCGTGTATTGCTGCTG CAAGACTACAAAGACCATGACGG       | STM14_5326-3xFlag::Km                         |
| STM14_5326-3FlagRv | GCTGCGGAACTGAAAACGGTCACTGGAAATTAGCTGTA TCACATATGAATATCCTCCTTAG        | STM14_5326-3xFlag::Km                         |
| 1932fin-P1R        | CCCGCCAACATGCGCAGCAAGTACTCAAAGTTGAACACC TCAGTGTAGGCTGGAGCTGCTTC       | translational STM14_1932- <i>lac40</i> fusion |
| 1932fin-P4         | AGGACTTTTGGGTCTGATCTCGTTGAGATTCCGGCTGGTTG CTATTCCGGGATCCGTCGACC       | translational STM14_1932- <i>lac40</i> fusion |
| 3199fin-P1R        | AAAAAAGGCCCGGAATGGCAGCCTCAAATGGAATATGTA TTAGTGTAGGCTGGAGCTGCTTC       | translational STM14_3199- <i>lac40</i> fusion |
| 3199fin-P4         | CGGAGAGGCTGAGATTCTGGCGGGACCGTTAGAACCTCCA ATTATTCCGGGATCCGTCGACC       | translational STM14_3199- <i>lac40</i> fusion |
| 5469fin-P1R        | CTCGCACCAATTATCTTATCCTTCTTTGTCTCTTCAATTTT CAGTGTAGGCTGGAGCTGCTTC      | translational STM14_5469- <i>lac40</i> fusion |
| 5469fin-P4         | TATTGGCGCATGATGTTGGCAATGATGAACTGGAATCAG GGAATCCGGGATCCGTCGACC         | translational STM14_5469- <i>lac40</i> fusion |
| 5479fin-P1R        | CTCAGGCAACACGAGGTTGCATTGCTGAATGCGGTGAAAC TCAGTGTAGGCTGGAGCTGCTTC      | translational STM14_5479- <i>lac40</i> fusion |
| 5479fin-P4         | CAAATTCAGAAATGTGATGCCAGTATTGACTTCAGAAAC CGGATCCGGGATCCGTCGACC         | translational STM14_5479- <i>lac40</i> fusion |

## Supplementary Datasets

**Dataset S1. Putative homologs of small-uncharacterized  $\sigma^S$ -dependent genes.**

**Dataset S2. nLC-MS/MS data.**

**Dataset S3. The  $\sigma^S$ -dependent proteome of *S. Typhimurium* ATCC14028 and comparison with published transcriptomic data.**

## Supplementary References

- 67 Datsenko, K. A. & Wanner, B. L. One-step inactivation of chromosomal genes in *Escherichia coli* K-12 using PCR products. *Proc Natl Acad Sci USA* **97**, 6640-6645, doi:10.1073/pnas.120163297 (2000).
- 68 Gerlach, R. G., Jackel, D., Holzer, S. U. & Hensel, M. Rapid oligonucleotide-based recombineering of the chromosome of *Salmonella enterica*. *Appl Environ Microbiol* **75**, 1575-1580, doi:10.1128/AEM.02509-08 (2009).
- 69 Ellermeier, C. D., Janakiraman, A. & Slauch, J. M. Construction of targeted single copy *lac* fusions using lambda Red and FLP-mediated site-specific recombination in bacteria. *Gene* **290**, 153-161 (2002).
- 70 Uzzau, S., Figueroa-Bossi, N., Rubino, S. & Bossi, L. Epitope tagging of chromosomal genes in *Salmonella*. *Proc Natl Acad Sci USA* **98**, 15264-15269, doi:10.1073/pnas.261348198 (2001).
- 71 Robbe-Saule, V., Lopes, M. D., Kolb, A. & Norel, F. Physiological effects of Crl in *Salmonella* are modulated by sigmaS level and promoter specificity. *J Bacteriol* **189**, 2976-2987, doi:10.1128/JB.01919-06 (2007).
- 72 Monteil, V. *et al.* Crl binds to domain 2 of sigma(S) and confers a competitive advantage on a natural *rpoS* mutant of *Salmonella enterica* serovar Typhi. *J Bacteriol* **192**, 6401-6410, doi:10.1128/JB.00801-10 (2010).
- 73 Altschul, S. F. *et al.* Gapped BLAST and PSI-BLAST: a new generation of protein database search programs. *Nucleic Acids Res* **25**, 3389-3402 (1997).
- 74 Pearson, W. R. Effective protein sequence comparison. *Methods Enzymol* **266**, 227-258 (1996).
- 75 Pearson, W. R. Rapid and sensitive sequence comparison with FASTP and FASTA. *Methods Enzymol* **183**, 63-98 (1990).
- 76 Katoh, K., Kuma, K., Toh, H. & Miyata, T. MAFFT version 5: improvement in accuracy of multiple sequence alignment. *Nucleic Acids Res* **33**, 511-518, doi:10.1093/nar/gki198 (2005).
- 77 Eddy, S. R. A new generation of homology search tools based on probabilistic inference. *Genome Inform* **23**, 205-211 (2009).
- 78 Iglewicz, B. & Hoaglin, D. How to detect and handle outliers. *ASQC Quality Press* (1993).
- 79 Monot, M., Orgeur, M., Camiade, E., Brehier, C. & Dupuy, B. COV2HTML: a visualization and analysis tool of bacterial next generation sequencing (NGS) data for postgenomics life scientists. *OmicS* **18**, 184-195, doi:10.1089/omi.2013.0119 (2014).
- 80 Thompson, J. D., Higgins, D. G. & Gibson, T. J. CLUSTAL W: improving the sensitivity of progressive multiple sequence alignment through sequence weighting, position-specific gap penalties and weight matrix choice. *Nucleic Acids Res* **22**, 4673-4680 (1994).
- 81 Tunnacliffe, A. & Wise, M. J. The continuing conundrum of the LEA proteins. *Naturwissenschaften* **94**, 791-812, doi:10.1007/s00114-007-0254-y (2007).
- 82 Brock, M., Maerker, C., Schutz, A., Volker, U. & Buckel, W. Oxidation of propionate to pyruvate in *Escherichia coli*. Involvement of methylcitrate dehydratase and aconitase. *European J Biochem* **269**, 6184-6194 (2002).
- 83 Simonte, F. M., Dotsch, A., Galego, L., Arraiano, C. & Gescher, J. Investigation on the anaerobic propionate degradation by *Escherichia coli* K12. *Mol Microbiol* **103**, 55-66, doi:10.1111/mmi.13541 (2017).

- 84 Eletsky, A. *et al.* Structural and functional characterization of DUF1471 domains of *Salmonella* proteins SrfN, YdgH/SssB, and YahO. *PloS One* **9**, e101787, doi:10.1371/journal.pone.0101787 (2014).
- 85 Ibanez-Ruiz, M., Robbe-Saule, V., Hermant, D., Labrude, S. & Norel, F. Identification of RpoS (sigma(S))-regulated genes in *Salmonella enterica* serovar typhimurium. *J Bacteriol* **182**, 5749-5756 (2000).
- 86 Guinote, I. B. *et al.* Breaking through the stress barrier: the role of BolA in Gram-negative survival. *World J Microbiol Biotechnol* **30**, 2559-2566, doi:10.1007/s11274-014-1702-4 (2014).
- 87 Patridge, E. V. & Ferry, J. G. WrbA from *Escherichia coli* and *Archaeoglobus fulgidus* is an NAD(P)H:quinone oxidoreductase. *J Bacteriol* **188**, 3498-3506, doi:10.1128/JB.188.10.3498-3506.2006 (2006).
- 88 Figueira, R. *et al.* Adaptation to sustained nitrogen starvation by *Escherichia coli* requires the eukaryote-like serine/threonine kinase YeaG. *Sci Rep* **5**, 17524, doi:10.1038/srep17524 (2015).
- 89 Kim, B. H. *et al.* The formation of cyclopropane fatty acids in *Salmonella enterica* serovar Typhimurium. *Microbiology* **151**, 209-218, doi:10.1099/mic.0.27265-0 (2005).
- 90 Frohlich, K. S., Papenfort, K., Fekete, A. & Vogel, J. A small RNA activates CFA synthase by isoform-specific mRNA stabilization. *EMBO J* **32**, 2963-2979, doi:10.1038/emboj.2013.222 (2013).
- 91 Osman, D. *et al.* The copper supply pathway to a *Salmonella* Cu,Zn-superoxide dismutase (SodCII) involves P(1B)-type ATPase copper efflux and periplasmic CueP. *Mol Microbiol* **87**, 466-477, doi:10.1111/mmi.12107 (2013).
- 92 Pilonieta, M. C., Erickson, K. D., Ernst, R. K. & Detweiler, C. S. A protein important for antimicrobial peptide resistance, YdeI/OmdA, is in the periplasm and interacts with OmpD/NmpC. *J Bacteriol* **191**, 7243-7252, doi:10.1128/JB.00688-09 (2009).
- 93 Lesniak, J., Barton, W. A. & Nikolov, D. B. Structural and functional features of the *Escherichia coli* hydroperoxide resistance protein OsmC. *Protein Sci* **12**, 2838-2843, doi:10.1110/ps.03375603 (2003).
- 94 Jarrett, J. T. & Lansbury, P. T., Jr. Amyloid fibril formation requires a chemically discriminating nucleation event: studies of an amyloidogenic sequence from the bacterial protein OsmB. *Biochemistry* **31**, 12345-12352 (1992).
- 95 Jung, J. U., Gutierrez, C., Martin, F., Ardourel, M. & Villarejo, M. Transcription of *osmB*, a gene encoding an *Escherichia coli* lipoprotein, is regulated by dual signals. Osmotic stress and stationary phase. *J Biol Chem* **265**, 10574-10581 (1990).
- 96 Ding, Q., Kusano, S., Villarejo, M. & Ishihama, A. Promoter selectivity control of *Escherichia coli* RNA polymerase by ionic strength: differential recognition of osmoregulated promoters by E sigma D and E sigma S holoenzymes. *Mol Microbiol* **16**, 649-656 (1995).
- 97 Osborne, M. J., Siddiqui, N., Iannuzzi, P. & Gehring, K. The solution structure of ChaB, a putative membrane ion antiporter regulator from *Escherichia coli*. *BMC Struct Biol* **4**, 9, doi:10.1186/1472-6807-4-9 (2004).
- 98 Kenyon, W. J. *et al.* Sigma(s)-Dependent carbon-starvation induction of *pbpG* (PBP 7) is required for the starvation-stress response in *Salmonella enterica* serovar Typhimurium. *Microbiology* **153**, 2148-2158, doi:10.1099/mic.0.2007/005199-0 (2007).
- 99 Yoshida, H. *et al.* YqjD is an inner membrane protein associated with stationary-phase ribosomes in *Escherichia coli*. *J Bacteriol* **194**, 4178-4183, doi:10.1128/JB.00396-12 (2012).

- 100 Kalliri, E., Mulrooney, S. B. & Hausinger, R. P. Identification of *Escherichia coli* YgaF as an L-2-hydroxyglutarate oxidase. *J Bacteriol* **190**, 3793-3798, doi:10.1128/JB.01977-07 (2008).
- 101 Metzner, M., Germer, J. & Hengge, R. Multiple stress signal integration in the regulation of the complex sigma S-dependent *csiD-ygaF-gabDTP* operon in *Escherichia coli*. *Mol Microbiol* **51**, 799-811 (2004).
- 102 Bernal-Cabas, M., Ayala, J. A. & Raivio, T. L. The Cpx envelope stress response modifies peptidoglycan cross-linking via the L,D-transpeptidase LdtD and the novel protein YgaU. *J Bacteriol* **197**, 603-614, doi:10.1128/JB.02449-14 (2015).
- 103 Ashraf, K. U. *et al.* The Potassium Binding Protein Kbp Is a Cytoplasmic Potassium Sensor. *Structure* **24**, 741-749, doi:10.1016/j.str.2016.03.017 (2016).
- 104 Navarre, C. & Goffeau, A. Membrane hyperpolarization and salt sensitivity induced by deletion of PMP3, a highly conserved small protein of yeast plasma membrane. *EMBO J* **19**, 2515-2524, doi:10.1093/emboj/19.11.2515 (2000).
- 105 De Block, J. *et al.* Yeast Pmp3p has an important role in plasma membrane organization. *J Cell Sci* **128**, 3646-3659, doi:10.1242/jcs.173211 (2015).
- 106 Raivio, T. L., Leblanc, S. K. & Price, N. L. The *Escherichia coli* Cpx envelope stress response regulates genes of diverse function that impact antibiotic resistance and membrane integrity. *J Bacteriol* **195**, 2755-2767, doi:10.1128/JB.00105-13 (2013).
- 107 Porcheron, G., Garenaux, A., Proulx, J., Sabri, M. & Dozois, C. M. Iron, copper, zinc, and manganese transport and regulation in pathogenic Enterobacteria: correlations between strains, site of infection and the relative importance of the different metal transport systems for virulence. *Front Cell Infect Microbiol* **3**, 90, doi:10.3389/fcimb.2013.00090 (2013).
- 108 Osman, D. & Cavet, J. S. Metal sensing in *Salmonella*: implications for pathogenesis. *Adv Microb Physiol* **58**, 175-232, doi:10.1016/B978-0-12-381043-4.00005-2 (2011).
- 109 Abdallah, J., Caldas, T., Kthiri, F., Kern, R. & Richarme, G. YhbO protects cells against multiple stresses. *J Bacteriol* **189**, 9140-9144, doi:10.1128/JB.01208-07 (2007).
- 110 Abdallah, J., Mihoub, M., Gautier, V. & Richarme, G. The DJ-1 superfamily members YhbO and YajL from *Escherichia coli* repair proteins from glycation by methylglyoxal and glyoxal. *Biochem Biophys Res Commun* **470**, 282-286, doi:10.1016/j.bbrc.2016.01.068 (2016).
- 111 Lee, C., Lee, J., Lee, J. Y. & Park, C. Characterization of the *Escherichia coli* YajL, YhbO and ElbB glyoxalases. *FEMS Microbiol Lett* **363**, doi:10.1093/femsle/fnv239 (2016).
- 112 Bishop, R. E., Leskiw, B. K., Hodges, R. S., Kay, C. M. & Weiner, J. H. The entericidin locus of *Escherichia coli* and its implications for programmed bacterial cell death. *J Mol Biol* **280**, 583-596, doi:10.1006/jmbi.1998.1894 (1998).
- 113 Zheng, X., Ji, Y., Weng, X. & Huang, X. RpoS-dependent expression of OsmY in *Salmonella enterica* serovar typhi: activation under stationary phase and SPI-2-inducing conditions. *Curr Microbiol* **70**, 877-882, doi:10.1007/s00284-015-0802-1 (2015).
- 114 De Martino, M., Ershov, D., van den Berg, P. J., Tans, S. J. & Meyer, A. S. Single-Cell Analysis of the Dps Response to Oxidative Stress. *J Bacteriol* **198**, 1662-1674, doi:10.1128/JB.00239-16 (2016).
- 115 Yoo, A. Y. *et al.* Requirement of Fur for the full induction of Dps expression in *Salmonella enterica* serovar typhimurium. *J Microbiol Biotechnol* **17**, 1452-1459 (2007).



- 116 Domka, J., Lee, J. & Wood, T. K. YliH (BssR) and YceP (BssS) regulate *Escherichia coli* K-12 biofilm formation by influencing cell signaling. *Appl Environ Microbiol* **72**, 2449-2459, doi:10.1128/AEM.72.4.2449-2459.2006 (2006).
- 117 Figueroa-Bossi, N., Lemire, S., Maloriol, D., Balbontin, R., Casadesus, J. & Bossi, L. Loss of Hfq activates the sigmaE-dependent envelope stress response in *Salmonella enterica*. *Mol Microbiol* **62**, 838-852 (2006).
- 118 Chang, A. C. & Cohen, S. N. Construction and characterization of amplifiable multicopy DNA cloning vehicles derived from the P15A cryptic miniplasmid. *J Bacteriol* **134**, 1141-1156 (1978).
- 119 Kowarz, L., Coynault, C., Robbe-Saule, V. & Norel, F. The *Salmonella typhimurium* *katF* (*rpoS*) gene: cloning, nucleotide sequence, and regulation of *spvR* and *spvABCD* virulence plasmid genes. *J Bacteriol* **176**, 6852-6860 (1994).
